# Supplementary material for: Genome-wide analysis of local chromatin packing in Arabidopsis thaliana
Source: Genome Res. 2015 Feb;25(2):246–56. doi: 10.1101/gr.170332.113 (PMC4315298; doi:10.1101/gr.170332.113)
Supplement: Supplemental Material [file supp_gr.170332.113_Supp_Table_S1.xlsx]

## Sheet: Sheet1
Number of read pairs after filtering and removal of PCR duplicates
Sample and restriction enzyme	Type of interaction			Total reads
	Intra-chromosomal (total)	Intra-chromosomal (within 5 kb)	Inter-chromosomal
DpnII, replicate 1	24153488	5036399	7170735	31324223
DpnII, replicate 2	52238461	7887400	15336767	67575228
HindIII	11661412	2655284	2817304	14478716
