# Supplementary material for: Genome-wide analysis of local chromatin packing in Arabidopsis thaliana
Source: Genome Res. 2015 Feb;25(2):246–56. doi: 10.1101/gr.170332.113 (PMC4315298; doi:10.1101/gr.170332.113)
Supplement: Supplemental Material [file supp_gr.170332.113_Supp_Table_S2.xlsx]

## Sheet: Sheet1
Pearson Correlation between 20 kb normalized Hi-C chr1-chr1 contact maps
	DpnII replicate 1	DpnII replicate 2	HindIII
DpnII replicate 1	/	/	/
DpnII replicate 2	0.984371	/	/
HindIII	0.889541	0.89833	/
Pearson Correlation between 20 kb normalized Hi-C chr2-chr2 contact maps
	DpnII replicate 1	DpnII replicate 2	HindIII
DpnII replicate 1	/	/	/
DpnII replicate 2	0.970338	/	/
HindIII	0.880428	0.910128	/
Pearson Correlation between 20 kb normalized Hi-C chr3-chr3 contact maps
	DpnII replicate 1	DpnII replicate 2	HindIII
DpnII replicate 1	/	/	/
DpnII replicate 2	0.988642	/	/
HindIII	0.901136	0.905598	/
Pearson Correlation between 20 kb normalized Hi-C chr4-chr4 contact maps
	DpnII replicate 1	DpnII replicate 2	HindIII
DpnII replicate 1	/	/	/
DpnII replicate 2	0.986752	/	/
HindIII	0.901147	0.906682	/
Pearson Correlation between 20 kb normalized Hi-C chr5-chr5 contact maps
	DpnII replicate 1	DpnII replicate 2	HindIII
DpnII replicate 1	/	/	/
DpnII replicate 2	0.986999	/	/
HindIII	0.901813	0.905781	/
