# Supplementary material for: Genome-wide analysis of local chromatin packing in Arabidopsis thaliana
Source: Genome Res. 2015 Feb;25(2):246–56. doi: 10.1101/gr.170332.113 (PMC4315298; doi:10.1101/gr.170332.113)
Supplement: Supplemental Material [file supp_gr.170332.113_Supp_Table_S10.xlsx]

## Sheet: significant_interactions_intra
Statistically significant interacting intrachromosomal loci were identified by HOMER software. Reference: Heinz S, Benner C, Spann N, Bertolino E et al. 2010. Simple Combinations of Lineage-Determining Transcription Factors Prime cis-Regulatory Elements Required for Macrophage and B Cell Identities. Mol Cell May 28;38(4):576-589.
Total 5773 intra-chromosomal significant interacting loci were identified under FDR 0.01, bins not meet the requirement for normalization and in the centromere regions were excluded
chr(1)	start(1)	end(1)	Total Reads(1)	chr(2)	start(2)	end(2)	Total Reads(2)	Interaction Reads	Expected Reads	FDR
Chr1	30424001	30426000	1972	Chr1	4001	6000	1799	18	0.03651	0
Chr1	300001	302000	2661	Chr1	298001	300000	5177	348	187.22	0
Chr1	5236001	5238000	4374	Chr1	5232001	5234000	4557	265	142.417	0
Chr1	7072001	7074000	9252	Chr1	7064001	7066000	4739	309	190.156	0
Chr1	7078001	7080000	2364	Chr1	7070001	7072000	8519	166	87.9311	0
Chr1	7080001	7082000	2348	Chr1	7070001	7072000	8519	151	72.8428	0
Chr1	7230001	7232000	3080	Chr1	7220001	7222000	7594	175	96.2593	0
Chr1	19072001	19074000	1765	Chr1	9628001	9630000	3386	19	0.037005	0
Chr1	11510001	11512000	6407	Chr1	11490001	11492000	1047	66	18.076	0
Chr1	11510001	11512000	6407	Chr1	11498001	11500000	830	67	22.6821	0
Chr1	11514001	11516000	3518	Chr1	11502001	11504000	4187	130	61.2189	0
Chr1	11520001	11522000	3809	Chr1	11502001	11504000	4187	107	47.8099	0
Chr1	13024001	13026000	1837	Chr1	13000001	13002000	6821	73	27.6941	0
Chr1	13190001	13192000	4426	Chr1	13168001	13170000	1908	71	24.2024	0
Chr1	13654001	13656000	1606	Chr1	13646001	13648000	2162	117	21.7952	0
Chr1	16518001	16520000	5280	Chr1	16510001	16512000	1791	125	49.6412	0
Chr1	16522001	16524000	8594	Chr1	16510001	16512000	1791	117	56.5763	0
Chr1	16528001	16530000	2699	Chr1	16510001	16512000	1791	58	13.0607	0
Chr1	16520001	16522000	2051	Chr1	16512001	16514000	6386	185	67.5856	0
Chr1	16522001	16524000	8594	Chr1	16512001	16514000	6386	1439	232.309	0
Chr1	16522001	16524000	8594	Chr1	16514001	16516000	3487	369	153.338	0
Chr1	16524001	16526000	1788	Chr1	16516001	16518000	3998	121	37.2612	0
Chr1	16526001	16528000	5326	Chr1	16516001	16518000	3998	453	92.8908	0
Chr1	16526001	16528000	5326	Chr1	16518001	16520000	5280	365	148.085	0
Chr1	16640001	16642000	2677	Chr1	16626001	16628000	6405	122	53.9651	0
Chr1	16640001	16642000	2677	Chr1	16628001	16630000	7145	137	65.8272	0
Chr1	17680001	17682000	5574	Chr1	17668001	17670000	3692	171	93.2015	0
Chr1	17682001	17684000	2699	Chr1	17668001	17670000	3692	96	41.0136	0
Chr1	18854001	18856000	1854	Chr1	18846001	18848000	1531	61	20.9118	0
Chr1	18972001	18974000	1554	Chr1	18962001	18964000	7847	120	52.69	0
Chr1	18974001	18976000	1398	Chr1	18962001	18964000	7847	104	41.8022	0
Chr1	20090001	20092000	4743	Chr1	20084001	20086000	4536	257	152.064	0
Chr1	27558001	27560000	1470	Chr1	27546001	27548000	3331	70	23.8427	0
Chr2	26001	28000	1104	Chr2	12001	14000	1952	53	7.25971	0
Chr2	16001	18000	1168	Chr2	14001	16000	1827	72	24.827	0
Chr2	18001	20000	697	Chr2	14001	16000	1827	54	11.0719	0
Chr2	28001	30000	2231	Chr2	14001	16000	1827	55	15.0925	0
Chr2	30001	32000	2261	Chr2	14001	16000	1827	48	13.446	0
Chr2	24001	26000	653	Chr2	20001	22000	623	41	4.62117	0
Chr2	34001	36000	1743	Chr2	32001	34000	1511	115	44.9002	0
Chr2	60001	62000	590	Chr2	46001	48000	1061	24	3.42658	0
Chr2	584001	586000	5175	Chr2	562001	564000	1094	62	20.5897	0
Chr2	1470001	1472000	3244	Chr2	1450001	1452000	2273	78	27.6294	0
Chr2	1632001	1634000	4866	Chr2	1622001	1624000	1592	100	45.0608	0
Chr2	1632001	1634000	4866	Chr2	1628001	1630000	1716	185	93.2387	0
Chr2	1634001	1636000	3910	Chr2	1628001	1630000	1716	143	59.5121	0
Chr2	1694001	1696000	5032	Chr2	1662001	1664000	1848	56	17.5981	0
Chr2	2000001	2002000	2715	Chr2	1972001	1974000	2655	56	18.0006	0
Chr2	2280001	2282000	2562	Chr2	2274001	2276000	2672	132	58.8272	0
Chr2	5580001	5582000	7884	Chr2	5554001	5556000	3285	104	39.6454	0
Chr2	5582001	5584000	3939	Chr2	5554001	5556000	3285	64	18.4695	0
Chr2	5580001	5582000	7884	Chr2	5556001	5558000	2194	82	28.6235	0
Chr2	5580001	5582000	7884	Chr2	5558001	5560000	3867	120	54.4489	0
Chr2	5578001	5580000	3626	Chr2	5560001	5562000	6819	118	55.0681	0
Chr2	5580001	5582000	7884	Chr2	5560001	5562000	6819	270	104.875	0
Chr2	5582001	5584000	3939	Chr2	5560001	5562000	6819	126	48.0429	0
Chr2	5630001	5632000	3683	Chr2	5614001	5616000	4824	109	48.4161	0
Chr2	5902001	5904000	4565	Chr2	5878001	5880000	5559	95	40.5532	0
Chr2	5904001	5906000	3525	Chr2	5880001	5882000	6826	91	38.1822	0
Chr2	5902001	5904000	4565	Chr2	5882001	5884000	6218	131	53.5588	0
Chr2	5906001	5908000	2297	Chr2	5884001	5886000	7634	90	30.9863	0
Chr2	6008001	6010000	4159	Chr2	5988001	5990000	5874	115	53.5322	0
Chr2	6120001	6122000	8688	Chr2	6070001	6072000	2164	47	13.1198	0
Chr2	6786001	6788000	4720	Chr2	6780001	6782000	5834	265	163.553	0
Chr2	6820001	6822000	3215	Chr2	6816001	6818000	3904	190	105.566	0
Chr2	6846001	6848000	6193	Chr2	6836001	6838000	3485	221	93.3277	0
Chr2	6846001	6848000	6193	Chr2	6838001	6840000	2774	211	90.3748	0
Chr2	6846001	6848000	6193	Chr2	6840001	6842000	1908	149	79.0905	0
Chr2	6914001	6916000	2777	Chr2	6910001	6912000	4341	189	103.502	0
Chr2	6942001	6944000	2921	Chr2	6936001	6938000	3643	147	72.9083	0
Chr2	6944001	6946000	2019	Chr2	6936001	6938000	3643	101	40.0163	0
Chr2	7014001	7016000	3983	Chr2	7006001	7008000	4977	200	107.635	0
Chr2	7118001	7120000	7626	Chr2	7106001	7108000	2945	158	80.1009	0
Chr2	7118001	7120000	7626	Chr2	7112001	7114000	1234	119	58.0255	0
Chr2	7240001	7242000	1797	Chr2	7212001	7214000	5432	62	15.5698	0
Chr2	7238001	7240000	1562	Chr2	7220001	7222000	4928	61	19.639	0
Chr2	7240001	7242000	1797	Chr2	7220001	7222000	4928	66	20.3688	0
Chr2	7228001	7230000	3476	Chr2	7224001	7226000	5454	260	148.295	0
Chr2	7234001	7236000	2283	Chr2	7224001	7226000	5454	128	52.0134	0
Chr2	7236001	7238000	2844	Chr2	7224001	7226000	5454	136	55.7219	0
Chr2	7236001	7238000	2844	Chr2	7226001	7228000	3674	100	44.1719	0
Chr2	7394001	7396000	8319	Chr2	7388001	7390000	2521	264	134.967	0
Chr2	8224001	8226000	5800	Chr2	8208001	8210000	1651	83	33.253	0
Chr2	8258001	8260000	2424	Chr2	8244001	8246000	3236	78	29.7181	0
Chr2	8338001	8340000	3351	Chr2	8334001	8336000	4198	213	120.952	0
Chr2	8550001	8552000	5192	Chr2	8544001	8546000	1547	137	67.0681	0
Chr2	8848001	8850000	5242	Chr2	8844001	8846000	3732	269	156.423	0
Chr2	9008001	9010000	6495	Chr2	9006001	9008000	4040	403	254.784	0
Chr2	9012001	9014000	4095	Chr2	9008001	9010000	6495	308	184.822	0
Chr2	9116001	9118000	4684	Chr2	9112001	9114000	3437	216	123.972	0
Chr2	9872001	9874000	1371	Chr2	9864001	9866000	6193	106	47.8916	0
Chr2	11254001	11256000	6621	Chr2	11250001	11252000	3623	314	196.767	0
Chr2	12236001	12238000	2258	Chr2	12222001	12224000	3961	96	39.0438	0
Chr2	12580001	12582000	2754	Chr2	12560001	12562000	6175	105	45.2653	0
Chr2	12664001	12666000	3300	Chr2	12656001	12658000	3724	129	62.6939	0
Chr2	12664001	12666000	3300	Chr2	12660001	12662000	4176	223	113.119	0
Chr2	13504001	13506000	1786	Chr2	13502001	13504000	2088	125	53.9669	0
Chr2	14610001	14612000	5021	Chr2	14582001	14584000	4495	94	39.5632	0
Chr2	14730001	14732000	4770	Chr2	14726001	14728000	2868	201	116.96	0
Chr2	15102001	15104000	874	Chr2	15090001	15092000	5064	75	20.6564	0
Chr2	16234001	16236000	4140	Chr2	16228001	16230000	1043	87	36.4343	0
Chr2	16572001	16574000	3031	Chr2	16570001	16572000	3531	279	153.306	0
Chr2	17492001	17494000	5675	Chr2	17490001	17492000	2956	399	232.844	0
Chr2	17738001	17740000	1185	Chr2	17734001	17736000	5127	124	61.5593	0
Chr2	18648001	18650000	1474	Chr2	18644001	18646000	4249	146	66.4209	0
Chr2	18914001	18916000	1936	Chr2	18912001	18914000	6482	287	167.994	0
Chr2	18948001	18950000	3286	Chr2	18946001	18948000	4725	390	212.933	0
Chr2	19266001	19268000	4005	Chr2	19254001	19256000	2354	106	47.9446	0
Chr2	19470001	19472000	4474	Chr2	19468001	19470000	1142	188	88.023	0
Chr2	19564001	19566000	1645	Chr2	19560001	19562000	5053	160	86.3935	0
Chr2	19592001	19594000	3100	Chr2	19588001	19590000	3783	231	128.215	0
Chr2	19694001	19696000	2013	Chr2	19690001	19692000	2602	203	104.989	0
Chr3	2001	4000	2373	Chr3	1	2000	1730	219	87.76	0
Chr3	4001	6000	2838	Chr3	1	2000	1730	141	71.3921	0
Chr3	4001	6000	2838	Chr3	2001	4000	2373	283	131.356	0
Chr3	23456001	23458000	2425	Chr3	2001	4000	2373	18	0.033257	0
Chr3	6001	8000	1806	Chr3	4001	6000	2838	187	95.3487	0
Chr3	16001	18000	2902	Chr3	14001	16000	2989	238	138.155	0
Chr3	28001	30000	4965	Chr3	24001	26000	1999	177	96.8585	0
Chr3	190001	192000	2587	Chr3	188001	190000	3539	187	104.396	0
Chr3	200001	202000	3398	Chr3	198001	200000	2319	166	86.8168	0
Chr3	230001	232000	4784	Chr3	226001	228000	4023	209	123.065	0
Chr3	248001	250000	6608	Chr3	246001	248000	4324	386	230.229	0
Chr3	252001	254000	5506	Chr3	246001	248000	4324	190	107.246	0
Chr3	250001	252000	3151	Chr3	248001	250000	6608	276	168.186	0
Chr3	252001	254000	5506	Chr3	248001	250000	6608	358	207.263	0
Chr3	252001	254000	5506	Chr3	250001	252000	3151	238	141.579	0
Chr3	264001	266000	5903	Chr3	262001	264000	5685	414	264.834	0
Chr3	272001	274000	6358	Chr3	270001	272000	7899	573	371.226	0
Chr3	282001	284000	6252	Chr3	278001	280000	6466	324	213.754	0
Chr3	286001	288000	3524	Chr3	278001	280000	6466	161	77.7555	0
Chr3	282001	284000	6252	Chr3	280001	282000	6275	425	293.844	0
Chr3	284001	286000	4664	Chr3	280001	282000	6275	266	156.974	0
Chr3	298001	300000	3413	Chr3	296001	298000	4340	224	126.119	0
Chr3	312001	314000	7135	Chr3	310001	312000	5814	466	332.358	0
Chr3	314001	316000	3266	Chr3	312001	314000	7135	295	185.746	0
Chr3	320001	322000	6775	Chr3	318001	320000	6019	466	324.662	0
Chr3	340001	342000	4344	Chr3	338001	340000	4631	280	172.878	0
Chr3	342001	344000	4594	Chr3	338001	340000	4631	252	127.391	0
Chr3	342001	344000	4594	Chr3	340001	342000	4344	282	167.491	0
Chr3	348001	350000	6738	Chr3	344001	346000	5111	331	198.261	0
Chr3	360001	362000	4999	Chr3	358001	360000	4739	350	208.38	0
Chr3	382001	384000	6724	Chr3	380001	382000	2784	289	178.386	0
Chr3	392001	394000	2043	Chr3	390001	392000	2940	133	63.2598	0
Chr3	398001	400000	3627	Chr3	396001	398000	4357	301	165.87	0
Chr3	510001	512000	4672	Chr3	508001	510000	1230	133	59.3399	0
Chr3	556001	558000	4658	Chr3	554001	556000	2721	210	124.44	0
Chr3	560001	562000	6106	Chr3	558001	560000	1767	198	101.046	0
Chr3	564001	566000	4018	Chr3	562001	564000	3684	258	137.561	0
Chr3	688001	690000	7392	Chr3	686001	688000	3322	338	221.728	0
Chr3	690001	692000	6768	Chr3	686001	688000	3322	259	143.225	0
Chr3	690001	692000	6768	Chr3	688001	690000	7392	677	441.085	0
Chr3	742001	744000	4210	Chr3	740001	742000	3479	252	155.175	0
Chr3	908001	910000	6620	Chr3	906001	908000	2242	265	159.274	0
Chr3	960001	962000	3259	Chr3	958001	960000	3922	236	134.996	0
Chr3	1054001	1056000	2820	Chr3	1052001	1054000	2243	165	72.8748	0
Chr3	1090001	1092000	3033	Chr3	1088001	1090000	6684	357	180.227	0
Chr3	1092001	1094000	3544	Chr3	1088001	1090000	6684	259	149.441	0
Chr3	1190001	1192000	4693	Chr3	1186001	1188000	2195	155	80.5733	0
Chr3	1320001	1322000	3654	Chr3	1318001	1320000	3276	216	114.661	0
Chr3	1322001	1324000	3479	Chr3	1318001	1320000	3276	157	77.2999	0
Chr3	1346001	1348000	6166	Chr3	1342001	1344000	1547	133	63.6621	0
Chr3	1356001	1358000	5488	Chr3	1354001	1356000	1350	200	72.6656	0
Chr3	1364001	1366000	2415	Chr3	1362001	1364000	5864	235	135.906	0
Chr3	1410001	1412000	3546	Chr3	1408001	1410000	3757	240	137.098	0
Chr3	1426001	1428000	2734	Chr3	1424001	1426000	2951	167	89.4564	0
Chr3	1494001	1496000	3437	Chr3	1478001	1480000	3676	86	33.6795	0
Chr3	1512001	1514000	3485	Chr3	1510001	1512000	2666	182	92.6589	0
Chr3	1546001	1548000	2672	Chr3	1544001	1546000	3285	172	95.3398	0
Chr3	1560001	1562000	5897	Chr3	1556001	1558000	2633	193	103.58	0
Chr3	1638001	1640000	5523	Chr3	1634001	1636000	2613	174	92.7687	0
Chr3	1642001	1644000	1864	Chr3	1638001	1640000	5523	137	67.9541	0
Chr3	1690001	1692000	3326	Chr3	1688001	1690000	3387	200	112.578	0
Chr3	1734001	1736000	4091	Chr3	1714001	1716000	3504	73	26.8396	0
Chr3	1734001	1736000	4091	Chr3	1720001	1722000	4450	107	47.8464	0
Chr3	1734001	1736000	4091	Chr3	1722001	1724000	2928	86	35.7434	0
Chr3	1784001	1786000	5179	Chr3	1780001	1782000	4159	248	152.925	0
Chr3	3112001	3114000	8735	Chr3	1936001	1938000	4402	17	1.23838	0
Chr3	3112001	3114000	8735	Chr3	1938001	1940000	3953	16	1.11219	0
Chr3	3106001	3108000	4321	Chr3	1944001	1946000	2630	15	0.381632	0
Chr3	3112001	3114000	8735	Chr3	1944001	1946000	2630	21	0.748822	0
Chr3	3102001	3104000	4609	Chr3	1946001	1948000	4228	17	0.651487	0
Chr3	3108001	3110000	3213	Chr3	1946001	1948000	4228	18	0.451903	0
Chr3	3110001	3112000	3250	Chr3	1946001	1948000	4228	15	0.452209	0
Chr3	3112001	3114000	8735	Chr3	1946001	1948000	4228	19	1.19436	0
Chr3	3114001	3116000	6437	Chr3	1946001	1948000	4228	22	0.893347	0
Chr3	3106001	3108000	4321	Chr3	1948001	1950000	4614	22	0.665219	0
Chr3	3112001	3114000	8735	Chr3	1948001	1950000	4614	25	1.30846	0
Chr3	3114001	3116000	6437	Chr3	1948001	1950000	4614	17	0.97835	0
Chr3	3120001	3122000	2953	Chr3	1948001	1950000	4614	15	0.481272	0
Chr3	3140001	3142000	3847	Chr3	1948001	1950000	4614	15	0.613205	0
Chr3	3112001	3114000	8735	Chr3	1952001	1954000	1250	22	0.363153	0
Chr3	3114001	3116000	6437	Chr3	1952001	1954000	1250	16	0.271841	0
Chr3	3112001	3114000	8735	Chr3	1954001	1956000	1894	37	0.544307	0
Chr3	3114001	3116000	6437	Chr3	1954001	1956000	1894	26	0.407662	0
Chr3	1976001	1978000	4611	Chr3	1956001	1958000	3582	76	27.7984	0
Chr3	3096001	3098000	4723	Chr3	1956001	1958000	3582	15	0.562723	0
Chr3	3102001	3104000	4609	Chr3	1956001	1958000	3582	22	0.545315	0
Chr3	3104001	3106000	3757	Chr3	1956001	1958000	3582	20	0.444382	0
Chr3	3106001	3108000	4321	Chr3	1956001	1958000	3582	23	0.510425	0
Chr3	3108001	3110000	3213	Chr3	1956001	1958000	3582	26	0.379719	0
Chr3	3110001	3112000	3250	Chr3	1956001	1958000	3582	44	0.380798	0
Chr3	3112001	3114000	8735	Chr3	1956001	1958000	3582	93	1.00816	0
Chr3	3114001	3116000	6437	Chr3	1956001	1958000	3582	73	0.754206	0
Chr3	3116001	3118000	2254	Chr3	1956001	1958000	3582	21	0.274146	0
Chr3	3120001	3122000	2953	Chr3	1956001	1958000	3582	31	0.373064	0
Chr3	3122001	3124000	2573	Chr3	1956001	1958000	3582	30	0.330087	0
Chr3	3138001	3140000	4572	Chr3	1956001	1958000	3582	18	0.558493	0
Chr3	1960001	1962000	7821	Chr3	1958001	1960000	5606	648	360.792	0
Chr3	1972001	1974000	2586	Chr3	1958001	1960000	5606	106	34.7649	0
Chr3	1974001	1976000	3127	Chr3	1958001	1960000	5606	90	36.4353	0
Chr3	3098001	3100000	3081	Chr3	1958001	1960000	5606	15	0.562906	0
Chr3	3100001	3102000	3800	Chr3	1958001	1960000	5606	16	0.69151	0
Chr3	3102001	3104000	4609	Chr3	1958001	1960000	5606	40	0.834864	0
Chr3	3104001	3106000	3757	Chr3	1958001	1960000	5606	26	0.680338	0
Chr3	3106001	3108000	4321	Chr3	1958001	1960000	5606	44	0.781447	0
Chr3	3108001	3110000	3213	Chr3	1958001	1960000	5606	50	0.58134	0
Chr3	3110001	3112000	3250	Chr3	1958001	1960000	5606	76	0.582992	0
Chr3	3112001	3114000	8735	Chr3	1958001	1960000	5606	303	1.54347	0
Chr3	3114001	3116000	6437	Chr3	1958001	1960000	5606	227	1.15683	0
Chr3	3116001	3118000	2254	Chr3	1958001	1960000	5606	46	0.420015	0
Chr3	3118001	3120000	1559	Chr3	1958001	1960000	5606	33	0.298326	0
Chr3	3120001	3122000	2953	Chr3	1958001	1960000	5606	50	0.572387	0
Chr3	3122001	3124000	2573	Chr3	1958001	1960000	5606	84	0.506567	0
Chr3	3124001	3126000	860	Chr3	1958001	1960000	5606	25	0.172417	0
Chr3	3126001	3128000	1228	Chr3	1958001	1960000	5606	22	0.247934	0
Chr3	3128001	3130000	1433	Chr3	1958001	1960000	5606	32	0.288942	0
Chr3	3132001	3134000	1971	Chr3	1958001	1960000	5606	27	0.388495	0
Chr3	3134001	3136000	2212	Chr3	1958001	1960000	5606	15	0.427941	0
Chr3	3136001	3138000	3775	Chr3	1958001	1960000	5606	23	0.715458	0
Chr3	3138001	3140000	4572	Chr3	1958001	1960000	5606	18	0.857296	0
Chr3	16716001	16718000	4501	Chr3	1958001	1960000	5606	17	0.063555	0
Chr3	22576001	22578000	3103	Chr3	1958001	1960000	5606	17	0.04805	0
Chr3	22578001	22580000	2257	Chr3	1958001	1960000	5606	15	0.035385	0
Chr3	22580001	22582000	3518	Chr3	1958001	1960000	5606	30	0.055917	0
Chr3	1966001	1968000	1641	Chr3	1960001	1962000	7821	153	63.448	0
Chr3	1970001	1972000	2901	Chr3	1960001	1962000	7821	180	72.5247	0
Chr3	1972001	1974000	2586	Chr3	1960001	1962000	7821	117	54.3507	0
Chr3	1974001	1976000	3127	Chr3	1960001	1962000	7821	125	57.6351	0
Chr3	3096001	3098000	4723	Chr3	1960001	1962000	7821	22	1.19695	0
Chr3	3098001	3100000	3081	Chr3	1960001	1962000	7821	15	0.782076	0
Chr3	3100001	3102000	3800	Chr3	1960001	1962000	7821	15	0.960752	0
Chr3	3102001	3104000	4609	Chr3	1960001	1962000	7821	34	1.15992	0
Chr3	3104001	3106000	3757	Chr3	1960001	1962000	7821	40	0.94523	0
Chr3	3106001	3108000	4321	Chr3	1960001	1962000	7821	39	1.08571	0
Chr3	3108001	3110000	3213	Chr3	1960001	1962000	7821	65	0.807688	0
Chr3	3110001	3112000	3250	Chr3	1960001	1962000	7821	101	0.809983	0
Chr3	3112001	3114000	8735	Chr3	1960001	1962000	7821	365	2.14443	0
Chr3	3114001	3116000	6437	Chr3	1960001	1962000	7821	240	1.60725	0
Chr3	3116001	3118000	2254	Chr3	1960001	1962000	7821	51	0.584643	0
Chr3	3118001	3120000	1559	Chr3	1960001	1962000	7821	40	0.414782	0
Chr3	3120001	3122000	2953	Chr3	1960001	1962000	7821	70	0.79625	0
Chr3	3122001	3124000	2573	Chr3	1960001	1962000	7821	89	0.705324	0
Chr3	3124001	3126000	860	Chr3	1960001	1962000	7821	29	0.240123	0
Chr3	3126001	3128000	1228	Chr3	1960001	1962000	7821	25	0.345172	0
Chr3	3128001	3130000	1433	Chr3	1960001	1962000	7821	36	0.402812	0
Chr3	3130001	3132000	977	Chr3	1960001	1962000	7821	23	0.272929	0
Chr3	3132001	3134000	1971	Chr3	1960001	1962000	7821	21	0.541554	0
Chr3	3134001	3136000	2212	Chr3	1960001	1962000	7821	23	0.596209	0
Chr3	3136001	3138000	3775	Chr3	1960001	1962000	7821	29	0.997218	0
Chr3	3138001	3140000	4572	Chr3	1960001	1962000	7821	23	1.19421	0
Chr3	3140001	3142000	3847	Chr3	1960001	1962000	7821	16	1.01066	0
Chr3	16716001	16718000	4501	Chr3	1960001	1962000	7821	40	0.0883	0
Chr3	16718001	16720000	4130	Chr3	1960001	1962000	7821	19	0.081313	0
Chr3	22508001	22510000	4986	Chr3	1960001	1962000	7821	15	0.093057	0
Chr3	22514001	22516000	9865	Chr3	1960001	1962000	7821	32	0.17245	0
Chr3	22516001	22518000	7437	Chr3	1960001	1962000	7821	42	0.130427	0
Chr3	22518001	22520000	7516	Chr3	1960001	1962000	7821	24	0.134453	0
Chr3	22520001	22522000	7386	Chr3	1960001	1962000	7821	20	0.137692	0
Chr3	22576001	22578000	3103	Chr3	1960001	1962000	7821	26	0.066759	0
Chr3	22578001	22580000	2257	Chr3	1960001	1962000	7821	23	0.049162	0
Chr3	22580001	22582000	3518	Chr3	1960001	1962000	7821	57	0.077689	0
Chr3	22582001	22584000	2201	Chr3	1960001	1962000	7821	18	0.050161	0
Chr3	1970001	1972000	2901	Chr3	1962001	1964000	3916	124	45.353	0
Chr3	1972001	1974000	2586	Chr3	1962001	1964000	3916	92	32.9818	0
Chr3	3102001	3104000	4609	Chr3	1962001	1964000	3916	21	0.599436	0
Chr3	3104001	3106000	3757	Chr3	1962001	1964000	3916	20	0.488485	0
Chr3	3106001	3108000	4321	Chr3	1962001	1964000	3916	32	0.561082	0
Chr3	3108001	3110000	3213	Chr3	1962001	1964000	3916	26	0.417405	0
Chr3	3110001	3112000	3250	Chr3	1962001	1964000	3916	42	0.418591	0
Chr3	3112001	3114000	8735	Chr3	1962001	1964000	3916	104	1.10822	0
Chr3	3114001	3116000	6437	Chr3	1962001	1964000	3916	63	0.830611	0
Chr3	3116001	3118000	2254	Chr3	1962001	1964000	3916	26	0.302138	0
Chr3	3120001	3122000	2953	Chr3	1962001	1964000	3916	29	0.411794	0
Chr3	3122001	3124000	2573	Chr3	1962001	1964000	3916	38	0.364964	0
Chr3	3126001	3128000	1228	Chr3	1962001	1964000	3916	16	0.178809	0
Chr3	16716001	16718000	4501	Chr3	1962001	1964000	3916	19	0.045633	0
Chr3	22514001	22516000	9865	Chr3	1962001	1964000	3916	45	0.08912	0
Chr3	22516001	22518000	7437	Chr3	1962001	1964000	3916	35	0.067404	0
Chr3	22518001	22520000	7516	Chr3	1962001	1964000	3916	41	0.069484	0
Chr3	22520001	22522000	7386	Chr3	1962001	1964000	3916	30	0.071158	0
Chr3	22580001	22582000	3518	Chr3	1962001	1964000	3916	35	0.040149	0
Chr3	3110001	3112000	3250	Chr3	1966001	1968000	1641	15	0.185271	0
Chr3	3112001	3114000	8735	Chr3	1966001	1968000	1641	39	0.490505	0
Chr3	3114001	3116000	6437	Chr3	1966001	1968000	1641	32	0.367634	0
Chr3	3120001	3122000	2953	Chr3	1966001	1968000	1641	15	0.182604	0
Chr3	3122001	3124000	2573	Chr3	1966001	1968000	1641	22	0.161956	0
Chr3	22514001	22516000	9865	Chr3	1966001	1968000	1641	15	0.039445	0
Chr3	3106001	3108000	4321	Chr3	1970001	1972000	2901	26	0.434518	0
Chr3	3110001	3112000	3250	Chr3	1970001	1972000	2901	34	0.324169	0
Chr3	3112001	3114000	8735	Chr3	1970001	1972000	2901	93	0.858236	0
Chr3	3114001	3116000	6437	Chr3	1970001	1972000	2901	68	0.643249	0
Chr3	3120001	3122000	2953	Chr3	1970001	1972000	2901	22	0.319502	0
Chr3	3122001	3124000	2573	Chr3	1970001	1972000	2901	21	0.283374	0
Chr3	3106001	3108000	4321	Chr3	1972001	1974000	2586	31	0.382369	0
Chr3	3110001	3112000	3250	Chr3	1972001	1974000	2586	27	0.285264	0
Chr3	3112001	3114000	8735	Chr3	1972001	1974000	2586	93	0.755234	0
Chr3	3114001	3116000	6437	Chr3	1972001	1974000	2586	68	0.566049	0
Chr3	3116001	3118000	2254	Chr3	1972001	1974000	2586	17	0.205902	0
Chr3	3120001	3122000	2953	Chr3	1972001	1974000	2586	17	0.281157	0
Chr3	3122001	3124000	2573	Chr3	1972001	1974000	2586	25	0.249365	0
Chr3	3100001	3102000	3800	Chr3	1974001	1976000	3127	15	0.403853	0
Chr3	3104001	3106000	3757	Chr3	1974001	1976000	3127	16	0.397228	0
Chr3	3106001	3108000	4321	Chr3	1974001	1976000	3127	31	0.456263	0
Chr3	3110001	3112000	3250	Chr3	1974001	1976000	3127	29	0.340391	0
Chr3	3112001	3114000	8735	Chr3	1974001	1976000	3127	72	0.901185	0
Chr3	3114001	3116000	6437	Chr3	1974001	1976000	3127	48	0.67544	0
Chr3	3116001	3118000	2254	Chr3	1974001	1976000	3127	19	0.245694	0
Chr3	3120001	3122000	2953	Chr3	1974001	1976000	3127	25	0.335491	0
Chr3	3122001	3124000	2573	Chr3	1974001	1976000	3127	34	0.297555	0
Chr3	3102001	3104000	4609	Chr3	1976001	1978000	4611	15	0.711535	0
Chr3	3104001	3106000	3757	Chr3	1976001	1978000	4611	25	0.579691	0
Chr3	3106001	3108000	4321	Chr3	1976001	1978000	4611	24	0.665842	0
Chr3	3108001	3110000	3213	Chr3	1976001	1978000	4611	23	0.495339	0
Chr3	3110001	3112000	3250	Chr3	1976001	1978000	4611	24	0.496746	0
Chr3	3112001	3114000	8735	Chr3	1976001	1978000	4611	58	1.31513	0
Chr3	3114001	3116000	6437	Chr3	1976001	1978000	4611	63	0.985695	0
Chr3	3116001	3118000	2254	Chr3	1976001	1978000	4611	19	0.35855	0
Chr3	3120001	3122000	2953	Chr3	1976001	1978000	4611	20	0.489595	0
Chr3	3122001	3124000	2573	Chr3	1976001	1978000	4611	15	0.434233	0
Chr3	3126001	3128000	1228	Chr3	1976001	1978000	4611	17	0.213476	0
Chr3	3132001	3134000	1971	Chr3	1976001	1978000	4611	16	0.338184	0
Chr3	3136001	3138000	3775	Chr3	1976001	1978000	4611	23	0.624909	0
Chr3	3112001	3114000	8735	Chr3	1978001	1980000	1959	30	0.559141	0
Chr3	3114001	3116000	6437	Chr3	1978001	1980000	1959	22	0.419077	0
Chr3	3096001	3098000	4723	Chr3	1980001	1982000	3784	16	0.597397	0
Chr3	3106001	3108000	4321	Chr3	1980001	1982000	3784	15	0.54138	0
Chr3	3112001	3114000	8735	Chr3	1980001	1982000	3784	32	1.06903	0
Chr3	3114001	3116000	6437	Chr3	1980001	1982000	3784	20	0.801243	0
Chr3	3120001	3122000	2953	Chr3	1980001	1982000	3784	18	0.397977	0
Chr3	3096001	3098000	4723	Chr3	1982001	1984000	4739	18	0.740867	0
Chr3	3102001	3104000	4609	Chr3	1982001	1984000	4739	18	0.717435	0
Chr3	3104001	3106000	3757	Chr3	1982001	1984000	4739	18	0.584644	0
Chr3	3106001	3108000	4321	Chr3	1982001	1984000	4739	20	0.671532	0
Chr3	3112001	3114000	8735	Chr3	1982001	1984000	4739	21	1.32577	0
Chr3	3114001	3116000	6437	Chr3	1982001	1984000	4739	15	0.993668	0
Chr3	3120001	3122000	2953	Chr3	1982001	1984000	4739	16	0.493555	0
Chr3	3122001	3124000	2573	Chr3	1982001	1984000	4739	15	0.437746	0
Chr3	3136001	3138000	3775	Chr3	1982001	1984000	4739	17	0.631604	0
Chr3	3104001	3106000	3757	Chr3	1984001	1986000	4934	15	0.608437	0
Chr3	3108001	3110000	3213	Chr3	1984001	1986000	4934	15	0.519902	0
Chr3	3112001	3114000	8735	Chr3	1984001	1986000	4934	19	1.37973	0
Chr3	3102001	3104000	4609	Chr3	1986001	1988000	5283	15	0.809981	0
Chr3	3108001	3110000	3213	Chr3	1986001	1988000	5283	16	0.56361	0
Chr3	3140001	3142000	3847	Chr3	1986001	1988000	5283	16	0.726395	0
Chr3	2014001	2016000	3557	Chr3	2012001	2014000	3860	237	132.215	0
Chr3	2164001	2166000	4144	Chr3	2162001	2164000	4261	260	156.263	0
Chr3	2210001	2212000	3249	Chr3	2206001	2208000	5195	201	106.081	0
Chr3	2256001	2258000	4691	Chr3	2254001	2256000	6230	397	242.742	0
Chr3	2284001	2286000	4655	Chr3	2282001	2284000	2856	198	114.841	0
Chr3	2348001	2350000	3490	Chr3	2346001	2348000	2207	153	72.9587	0
Chr3	2356001	2358000	2100	Chr3	2354001	2356000	3880	162	78.8544	0
Chr3	2590001	2592000	2943	Chr3	2588001	2590000	3577	176	93.8098	0
Chr3	2594001	2596000	3366	Chr3	2592001	2594000	3214	195	93.519	0
Chr3	2600001	2602000	3980	Chr3	2598001	2600000	2565	163	85.5414	0
Chr3	2610001	2612000	4288	Chr3	2608001	2610000	2547	170	89.718	0
Chr3	2620001	2622000	6810	Chr3	2618001	2620000	3908	391	205.918	0
Chr3	2626001	2628000	4036	Chr3	2622001	2624000	4631	198	103.591	0
Chr3	2626001	2628000	4036	Chr3	2624001	2626000	4467	244	143.498	0
Chr3	2632001	2634000	4408	Chr3	2630001	2632000	2519	207	92.861	0
Chr3	2658001	2660000	6202	Chr3	2654001	2656000	2754	176	96.515	0
Chr3	2658001	2660000	6202	Chr3	2656001	2658000	3746	322	185.412	0
Chr3	2694001	2696000	4043	Chr3	2686001	2688000	6880	163	86.4079	0
Chr3	2724001	2726000	3859	Chr3	2720001	2722000	3833	162	81.3573	0
Chr3	2776001	2778000	3478	Chr3	2768001	2770000	7292	175	88.353	0
Chr3	2778001	2780000	5132	Chr3	2768001	2770000	7292	206	106.701	0
Chr3	2784001	2786000	3000	Chr3	2782001	2784000	5738	259	143.238	0
Chr3	2820001	2822000	3609	Chr3	2806001	2808000	3039	81	30.0807	0
Chr3	2836001	2838000	4433	Chr3	2834001	2836000	4588	288	177.6	0
Chr3	2904001	2906000	6115	Chr3	2900001	2902000	5505	339	183.255	0
Chr3	2936001	2938000	4977	Chr3	2932001	2934000	6335	307	161.268	0
Chr3	2942001	2944000	8176	Chr3	2940001	2942000	5683	487	329.17	0
Chr3	2950001	2952000	5386	Chr3	2946001	2948000	3098	164	88.8567	0
Chr3	3002001	3004000	5957	Chr3	3000001	3002000	5751	461	254.477	0
Chr3	3024001	3026000	5355	Chr3	3020001	3022000	6103	279	175.549	0
Chr3	3024001	3026000	5355	Chr3	3022001	3024000	5189	344	212.783	0
Chr3	3040001	3042000	4314	Chr3	3036001	3038000	3711	188	97.5944	0
Chr3	3086001	3088000	4797	Chr3	3082001	3084000	2704	151	77.8824	0
Chr3	3086001	3088000	4797	Chr3	3084001	3086000	3795	256	152.723	0
Chr3	3112001	3114000	8735	Chr3	3110001	3112000	3250	379	211.042	0
Chr3	3114001	3116000	6437	Chr3	3110001	3112000	3250	215	111.294	0
Chr3	3120001	3122000	2953	Chr3	3110001	3112000	3250	84	28.4025	0
Chr3	3114001	3116000	6437	Chr3	3112001	3114000	8735	754	418.771	0
Chr3	3120001	3122000	2953	Chr3	3112001	3114000	8735	219	90.9909	0
Chr3	3122001	3124000	2573	Chr3	3112001	3114000	8735	188	66.6926	0
Chr3	3124001	3126000	860	Chr3	3112001	3114000	8735	66	19.3778	0
Chr3	16716001	16718000	4501	Chr3	3112001	3114000	8735	30	0.093224	0
Chr3	16718001	16720000	4130	Chr3	3112001	3114000	8735	24	0.085847	0
Chr3	22576001	22578000	3103	Chr3	3112001	3114000	8735	16	0.070482	0
Chr3	22578001	22580000	2257	Chr3	3112001	3114000	8735	24	0.051904	0
Chr3	22580001	22582000	3518	Chr3	3112001	3114000	8735	37	0.082021	0
Chr3	3120001	3122000	2953	Chr3	3114001	3116000	6437	184	86.2698	0
Chr3	3122001	3124000	2573	Chr3	3114001	3116000	6437	138	60.4862	0
Chr3	16716001	16718000	4501	Chr3	3114001	3116000	6437	23	0.069872	0
Chr3	22576001	22578000	3103	Chr3	3114001	3116000	6437	15	0.052826	0
Chr3	3194001	3196000	4389	Chr3	3190001	3192000	3261	166	86.7303	0
Chr3	3214001	3216000	4784	Chr3	3210001	3212000	3197	170	87.3809	0
Chr3	3214001	3216000	4784	Chr3	3212001	3214000	3970	250	153.831	0
Chr3	3234001	3236000	2970	Chr3	3230001	3232000	6671	207	109.95	0
Chr3	3242001	3244000	5010	Chr3	3240001	3242000	4048	263	164.175	0
Chr3	3260001	3262000	5312	Chr3	3250001	3252000	2004	86	35.8133	0
Chr3	3314001	3316000	6238	Chr3	3306001	3308000	3211	138	69.8564	0
Chr3	3462001	3464000	7118	Chr3	3460001	3462000	3275	332	187.333	0
Chr3	3464001	3466000	2878	Chr3	3462001	3464000	7118	305	164.392	0
Chr3	3490001	3492000	3801	Chr3	3484001	3486000	3460	131	63.5081	0
Chr3	3506001	3508000	1517	Chr3	3504001	3506000	4007	126	57.5676	0
Chr3	3566001	3568000	5085	Chr3	3556001	3558000	4020	124	58.2086	0
Chr3	3598001	3600000	1984	Chr3	3596001	3598000	6031	216	105.046	0
Chr3	3600001	3602000	1988	Chr3	3596001	3598000	6031	152	74.9327	0
Chr3	3610001	3612000	1875	Chr3	3608001	3610000	4918	159	86.7344	0
Chr3	3662001	3664000	3059	Chr3	3646001	3648000	3176	74	24.9137	0
Chr3	3700001	3702000	1999	Chr3	3698001	3700000	4463	178	87.8811	0
Chr3	3734001	3736000	2545	Chr3	3732001	3734000	3899	170	90.8847	0
Chr3	3936001	3938000	5020	Chr3	3934001	3936000	7763	459	275.359	0
Chr3	3940001	3942000	2930	Chr3	3934001	3936000	7763	183	89.9766	0
Chr3	3940001	3942000	2930	Chr3	3938001	3940000	4470	175	94.2835	0
Chr3	3948001	3950000	7179	Chr3	3946001	3948000	5303	373	253.451	0
Chr3	3954001	3956000	5591	Chr3	3948001	3950000	7179	266	149.317	0
Chr3	3956001	3958000	4356	Chr3	3952001	3954000	5638	206	119.2	0
Chr3	3992001	3994000	5431	Chr3	3990001	3992000	3929	277	176.525	0
Chr3	4052001	4054000	5069	Chr3	4050001	4052000	3509	258	148.176	0
Chr3	4058001	4060000	3599	Chr3	4054001	4056000	2721	129	56.2787	0
Chr3	4070001	4072000	3666	Chr3	4066001	4068000	3309	148	73.9881	0
Chr3	4132001	4134000	5216	Chr3	4108001	4110000	2395	68	17.7946	0
Chr3	4130001	4132000	5443	Chr3	4110001	4112000	2755	73	25.6917	0
Chr3	4132001	4134000	5216	Chr3	4110001	4112000	2755	65	22.1372	0
Chr3	4114001	4116000	6971	Chr3	4112001	4114000	3991	424	248.867	0
Chr3	4128001	4130000	3178	Chr3	4112001	4114000	3991	88	27.4115	0
Chr3	4130001	4132000	5443	Chr3	4112001	4114000	3991	122	40.7224	0
Chr3	4128001	4130000	3178	Chr3	4114001	4116000	6971	196	54.3151	0
Chr3	4130001	4132000	5443	Chr3	4114001	4116000	6971	202	79.5541	0
Chr3	4132001	4134000	5216	Chr3	4114001	4116000	6971	137	67.5146	0
Chr3	4174001	4176000	2198	Chr3	4172001	4174000	4322	175	83.9092	0
Chr3	4182001	4184000	5205	Chr3	4180001	4182000	3769	326	168.355	0
Chr3	4212001	4214000	3931	Chr3	4206001	4208000	4871	176	91.9214	0
Chr3	4212001	4214000	3931	Chr3	4210001	4212000	3506	214	119.951	0
Chr3	4248001	4250000	4188	Chr3	4244001	4246000	3500	172	91.569	0
Chr3	4252001	4254000	2404	Chr3	4248001	4250000	4188	129	62.8659	0
Chr3	4268001	4270000	3909	Chr3	4266001	4268000	3684	225	130.376	0
Chr3	4288001	4290000	2600	Chr3	4284001	4286000	2051	99	38.6756	0
Chr3	4348001	4350000	5653	Chr3	4346001	4348000	4316	318	200.794	0
Chr3	4352001	4354000	6619	Chr3	4348001	4350000	5653	320	208.012	0
Chr3	4488001	4490000	3726	Chr3	4486001	4488000	3214	208	111.353	0
Chr3	4514001	4516000	3337	Chr3	4504001	4506000	1907	67	22.8029	0
Chr3	4522001	4524000	3936	Chr3	4520001	4522000	2895	194	104.558	0
Chr3	4556001	4558000	3336	Chr3	4554001	4556000	3129	191	101.945	0
Chr3	4590001	4592000	4358	Chr3	4586001	4588000	5282	273	145.577	0
Chr3	4620001	4622000	2279	Chr3	4618001	4620000	4022	171	88.7418	0
Chr3	4666001	4668000	2571	Chr3	4664001	4666000	5272	202	110.959	0
Chr3	4700001	4702000	4674	Chr3	4696001	4698000	3168	166	90.6948	0
Chr3	4720001	4722000	1934	Chr3	4716001	4718000	3440	103	45.4446	0
Chr3	4734001	4736000	4893	Chr3	4732001	4734000	3484	279	152.873	0
Chr3	4756001	4758000	2915	Chr3	4754001	4756000	4410	203	115.233	0
Chr3	4760001	4762000	2919	Chr3	4754001	4756000	4410	141	63.7835	0
Chr3	4768001	4770000	9087	Chr3	4764001	4766000	1957	201	102.118	0
Chr3	4778001	4780000	1994	Chr3	4766001	4768000	5079	73	26.1836	0
Chr3	4780001	4782000	3624	Chr3	4766001	4768000	5079	117	42.2025	0
Chr3	4770001	4772000	1779	Chr3	4768001	4770000	9087	243	128.226	0
Chr3	4778001	4780000	1994	Chr3	4768001	4770000	9087	158	54.1033	0
Chr3	4780001	4782000	3624	Chr3	4768001	4770000	9087	175	83.566	0
Chr3	4860001	4862000	3188	Chr3	4858001	4860000	4954	231	131.514	0
Chr3	4872001	4874000	3990	Chr3	4862001	4864000	4421	115	52.9131	0
Chr3	4872001	4874000	3990	Chr3	4866001	4868000	3925	145	72.0166	0
Chr3	4874001	4876000	2227	Chr3	4866001	4868000	3925	86	31.9515	0
Chr3	4882001	4884000	3275	Chr3	4868001	4870000	3448	74	25.9349	0
Chr3	4884001	4886000	4467	Chr3	4878001	4880000	3677	167	77.1544	0
Chr3	4920001	4922000	4786	Chr3	4912001	4914000	4066	136	67.771	0
Chr3	4920001	4922000	4786	Chr3	4916001	4918000	3528	170	93.8088	0
Chr3	4966001	4968000	5051	Chr3	4964001	4966000	3884	272	161.412	0
Chr3	4968001	4970000	4677	Chr3	4964001	4966000	3884	212	105.815	0
Chr3	4968001	4970000	4677	Chr3	4966001	4968000	5051	320	193.745	0
Chr3	5028001	5030000	4547	Chr3	5024001	5026000	2524	140	68.1984	0
Chr3	5092001	5094000	4814	Chr3	5088001	5090000	2818	158	79.9905	0
Chr3	5168001	5170000	3686	Chr3	5166001	5168000	2528	185	92.422	0
Chr3	5254001	5256000	2105	Chr3	5252001	5254000	3674	183	84.8346	0
Chr3	5268001	5270000	3085	Chr3	5266001	5268000	1719	123	57.3706	0
Chr3	5322001	5324000	2606	Chr3	5320001	5322000	3725	203	95.0242	0
Chr3	5332001	5334000	6598	Chr3	5330001	5332000	4416	572	267.154	0
Chr3	5384001	5386000	3462	Chr3	5382001	5384000	2775	168	90.8269	0
Chr3	5442001	5444000	3515	Chr3	5440001	5442000	2844	183	97.9442	0
Chr3	5444001	5446000	3900	Chr3	5440001	5442000	2844	153	76.4416	0
Chr3	5444001	5446000	3900	Chr3	5442001	5444000	3515	238	133.022	0
Chr3	5558001	5560000	3400	Chr3	5556001	5558000	2632	191	92.0359	0
Chr3	5650001	5652000	2459	Chr3	5646001	5648000	3185	117	54.7661	0
Chr3	5666001	5668000	3120	Chr3	5662001	5664000	3510	169	75.1008	0
Chr3	5704001	5706000	3844	Chr3	5702001	5704000	4064	277	144.471	0
Chr3	5714001	5716000	3146	Chr3	5710001	5712000	2979	136	63.967	0
Chr3	5784001	5786000	4777	Chr3	5782001	5784000	2665	205	115.743	0
Chr3	5788001	5790000	2567	Chr3	5784001	5786000	4777	159	78.9451	0
Chr3	5848001	5850000	3081	Chr3	5846001	5848000	3173	184	102.822	0
Chr3	5890001	5892000	5398	Chr3	5882001	5884000	2638	125	60.4046	0
Chr3	5906001	5908000	3103	Chr3	5904001	5906000	4456	216	127.847	0
Chr3	5974001	5976000	4453	Chr3	5972001	5974000	4195	298	174.451	0
Chr3	5998001	6000000	3081	Chr3	5986001	5988000	1889	58	18.0179	0
Chr3	6030001	6032000	6498	Chr3	6028001	6030000	4124	365	227.34	0
Chr3	6092001	6094000	2898	Chr3	6090001	6092000	6108	307	143.747	0
Chr3	6098001	6100000	4968	Chr3	6094001	6096000	3704	200	107.932	0
Chr3	6098001	6100000	4968	Chr3	6096001	6098000	1859	171	77.3886	0
Chr3	6108001	6110000	6230	Chr3	6106001	6108000	5764	432	281.213	0
Chr3	6112001	6114000	4643	Chr3	6108001	6110000	6230	306	160.73	0
Chr3	6114001	6116000	4536	Chr3	6112001	6114000	4643	278	170.681	0
Chr3	6132001	6134000	4069	Chr3	6128001	6130000	3652	169	88.6253	0
Chr3	6156001	6158000	2346	Chr3	6154001	6156000	3714	178	77.3898	0
Chr3	6176001	6178000	3398	Chr3	6174001	6176000	2573	168	81.0358	0
Chr3	6186001	6188000	4778	Chr3	6184001	6186000	3165	257	136.504	0
Chr3	6234001	6236000	4160	Chr3	6232001	6234000	6266	352	210.096	0
Chr3	6276001	6278000	3988	Chr3	6274001	6276000	3836	225	131.305	0
Chr3	6278001	6280000	3723	Chr3	6274001	6276000	3836	162	85.8366	0
Chr3	6284001	6286000	3684	Chr3	6282001	6284000	4181	223	127.86	0
Chr3	6308001	6310000	5810	Chr3	6306001	6308000	2931	234	137.228	0
Chr3	6310001	6312000	5882	Chr3	6306001	6308000	2931	201	97.6529	0
Chr3	6310001	6312000	5882	Chr3	6308001	6310000	5810	398	269.756	0
Chr3	6342001	6344000	5665	Chr3	6340001	6342000	3012	282	148.746	0
Chr3	6352001	6354000	2986	Chr3	6342001	6344000	5665	126	54.0206	0
Chr3	6354001	6356000	2587	Chr3	6342001	6344000	5665	110	40.5643	0
Chr3	6350001	6352000	3841	Chr3	6348001	6350000	5723	341	189.736	0
Chr3	6424001	6426000	5050	Chr3	6418001	6420000	3945	176	95.2816	0
Chr3	6426001	6428000	2795	Chr3	6418001	6420000	3945	100	42.0531	0
Chr3	6424001	6426000	5050	Chr3	6420001	6422000	5140	264	157.291	0
Chr3	6476001	6478000	4024	Chr3	6474001	6476000	3110	204	111.925	0
Chr3	6504001	6506000	3392	Chr3	6502001	6504000	2935	171	90.2387	0
Chr3	6570001	6572000	3653	Chr3	6566001	6568000	2303	125	55.3913	0
Chr3	6570001	6572000	3653	Chr3	6568001	6570000	3680	221	124.181	0
Chr3	6610001	6612000	5329	Chr3	6606001	6608000	1857	147	63.5693	0
Chr3	6662001	6664000	4461	Chr3	6660001	6662000	3114	209	123.528	0
Chr3	6754001	6756000	4871	Chr3	6752001	6754000	4999	336	211.723	0
Chr3	6816001	6818000	6440	Chr3	6810001	6812000	3001	179	90.92	0
Chr3	6816001	6818000	6440	Chr3	6812001	6814000	2284	166	87.4286	0
Chr3	6816001	6818000	6440	Chr3	6814001	6816000	4414	401	236.283	0
Chr3	6818001	6820000	2992	Chr3	6814001	6816000	4414	158	78.4697	0
Chr3	6874001	6876000	3636	Chr3	6870001	6872000	3004	150	70.553	0
Chr3	6874001	6876000	3636	Chr3	6872001	6874000	3119	203	103.441	0
Chr3	6966001	6968000	3629	Chr3	6964001	6966000	3286	194	112.07	0
Chr3	7010001	7012000	2352	Chr3	7008001	7010000	4815	187	92.2879	0
Chr3	7012001	7014000	5754	Chr3	7008001	7010000	4815	284	156.046	0
Chr3	7020001	7022000	3829	Chr3	7016001	7018000	5111	194	102.727	0
Chr3	7020001	7022000	3829	Chr3	7018001	7020000	6043	290	171.38	0
Chr3	7028001	7030000	5487	Chr3	7024001	7026000	6038	286	171.735	0
Chr3	7030001	7032000	5005	Chr3	7026001	7028000	4064	192	106.657	0
Chr3	7032001	7034000	3238	Chr3	7028001	7030000	5487	177	94.8903	0
Chr3	7060001	7062000	6128	Chr3	7058001	7060000	2536	238	133.131	0
Chr3	7086001	7088000	3821	Chr3	7084001	7086000	1459	154	52.5483	0
Chr3	23166001	23168000	3017	Chr3	7104001	7106000	5843	22	0.052229	0
Chr3	7166001	7168000	4931	Chr3	7160001	7162000	3726	189	96.4984	0
Chr3	7166001	7168000	4931	Chr3	7162001	7164000	1875	134	62.0605	0
Chr3	7262001	7264000	2282	Chr3	7260001	7262000	4575	188	100.719	0
Chr3	7334001	7336000	5377	Chr3	7332001	7334000	2403	217	115.982	0
Chr3	7336001	7338000	2590	Chr3	7334001	7336000	5377	228	121.557	0
Chr3	7338001	7340000	2718	Chr3	7334001	7336000	5377	165	88.7923	0
Chr3	7340001	7342000	5265	Chr3	7334001	7336000	5377	230	132.626	0
Chr3	7340001	7342000	5265	Chr3	7336001	7338000	2590	158	80.8329	0
Chr3	7340001	7342000	5265	Chr3	7338001	7340000	2718	228	119.269	0
Chr3	7342001	7344000	5433	Chr3	7338001	7340000	2718	167	85.8623	0
Chr3	7344001	7346000	5503	Chr3	7338001	7340000	2718	136	68.694	0
Chr3	7344001	7346000	5503	Chr3	7342001	7344000	5433	365	241.222	0
Chr3	7346001	7348000	4246	Chr3	7342001	7344000	5433	270	133.385	0
Chr3	7346001	7348000	4246	Chr3	7344001	7346000	5503	333	192.845	0
Chr3	7370001	7372000	3820	Chr3	7368001	7370000	3040	190	103.079	0
Chr3	7462001	7464000	2206	Chr3	7458001	7460000	4436	136	62.477	0
Chr3	7574001	7576000	4359	Chr3	7568001	7570000	3837	179	84.563	0
Chr3	7574001	7576000	4359	Chr3	7570001	7572000	4554	262	127.055	0
Chr3	7582001	7584000	4463	Chr3	7578001	7580000	2530	161	77.004	0
Chr3	7596001	7598000	5116	Chr3	7594001	7596000	1475	150	73.1563	0
Chr3	7626001	7628000	4718	Chr3	7624001	7626000	3913	328	184.29	0
Chr3	7764001	7766000	1934	Chr3	7730001	7732000	1610	27	4.32945	0
Chr3	7830001	7832000	4999	Chr3	7826001	7828000	2163	162	76.3555	0
Chr3	7830001	7832000	4999	Chr3	7828001	7830000	4174	374	205.507	0
Chr3	7832001	7834000	3183	Chr3	7830001	7832000	4999	266	157.705	0
Chr3	7876001	7878000	5479	Chr3	7874001	7876000	2181	245	117.127	0
Chr3	7878001	7880000	2042	Chr3	7876001	7878000	5479	206	107.198	0
Chr3	7888001	7890000	6041	Chr3	7886001	7888000	4709	388	237.841	0
Chr3	7890001	7892000	3446	Chr3	7886001	7888000	4709	193	95.9801	0
Chr3	7890001	7892000	3446	Chr3	7888001	7890000	6041	324	173.252	0
Chr3	7900001	7902000	2337	Chr3	7894001	7896000	4681	115	53.092	0
Chr3	7904001	7906000	3210	Chr3	7900001	7902000	2337	107	48.4756	0
Chr3	7914001	7916000	4278	Chr3	7912001	7914000	3566	311	143.358	0
Chr3	7970001	7972000	5383	Chr3	7968001	7970000	4172	311	201.68	0
Chr3	7972001	7974000	5269	Chr3	7968001	7970000	4172	288	139.984	0
Chr3	8014001	8016000	2237	Chr3	8012001	8014000	3801	163	87.8417	0
Chr3	8022001	8024000	5279	Chr3	8020001	8022000	2534	230	135.015	0
Chr3	8100001	8102000	1112	Chr3	8090001	8092000	2978	50	14.1455	0
Chr3	8118001	8120000	3257	Chr3	8116001	8118000	4508	287	153.738	0
Chr3	8160001	8162000	3783	Chr3	8140001	8142000	4043	130	32.6926	0
Chr3	8162001	8164000	2878	Chr3	8140001	8142000	4043	72	22.3956	0
Chr3	8360001	8362000	2350	Chr3	8358001	8360000	2717	160	81.7862	0
Chr3	8386001	8388000	3275	Chr3	8384001	8386000	4985	290	185.06	0
Chr3	8388001	8390000	2864	Chr3	8384001	8386000	4985	218	115.677	0
Chr3	8472001	8474000	4521	Chr3	8468001	8470000	2878	183	99.123	0
Chr3	8474001	8476000	2319	Chr3	8472001	8474000	4521	197	113.957	0
Chr3	8590001	8592000	1366	Chr3	8588001	8590000	5061	144	75.1334	0
Chr3	8606001	8608000	2136	Chr3	8588001	8590000	5061	68	24.7373	0
Chr3	8610001	8612000	3402	Chr3	8588001	8590000	5061	85	31.5434	0
Chr3	8628001	8630000	4197	Chr3	8624001	8626000	3355	187	92.5422	0
Chr3	8628001	8630000	4197	Chr3	8626001	8628000	3789	245	147.398	0
Chr3	8736001	8738000	3616	Chr3	8734001	8736000	4793	288	174.357	0
Chr3	8782001	8784000	4773	Chr3	8780001	8782000	3685	324	182.384	0
Chr3	8806001	8808000	6646	Chr3	8794001	8796000	3276	151	69.9842	0
Chr3	8834001	8836000	2506	Chr3	8830001	8832000	3481	136	65.6896	0
Chr3	8860001	8862000	4153	Chr3	8838001	8840000	3280	82	26.1805	0
Chr3	8862001	8864000	2329	Chr3	8838001	8840000	3280	48	13.4802	0
Chr3	8858001	8860000	2780	Chr3	8840001	8842000	2909	69	19.6145	0
Chr3	8860001	8862000	4153	Chr3	8840001	8842000	2909	86	25.9521	0
Chr3	8860001	8862000	4153	Chr3	8842001	8844000	1622	53	16.483	0
Chr3	8916001	8918000	3547	Chr3	8912001	8914000	3963	194	104.409	0
Chr3	8916001	8918000	3547	Chr3	8914001	8916000	2237	159	83.04	0
Chr3	8938001	8940000	2695	Chr3	8936001	8938000	4755	246	125.365	0
Chr3	8946001	8948000	3654	Chr3	8944001	8946000	3104	195	110.734	0
Chr3	8998001	9000000	7091	Chr3	8990001	8992000	2484	157	74.8574	0
Chr3	8998001	9000000	7091	Chr3	8994001	8996000	1161	119	56.2446	0
Chr3	8998001	9000000	7091	Chr3	8996001	8998000	1402	173	94.7953	0
Chr3	9022001	9024000	3014	Chr3	9016001	9018000	3774	124	59.0805	0
Chr3	9028001	9030000	4800	Chr3	9024001	9026000	4213	242	131.184	0
Chr3	9028001	9030000	4800	Chr3	9026001	9028000	4215	302	186.139	0
Chr3	9050001	9052000	4987	Chr3	9046001	9048000	2128	158	77.7046	0
Chr3	9232001	9234000	2564	Chr3	9226001	9228000	2768	99	42.4086	0
Chr3	9252001	9254000	4581	Chr3	9248001	9250000	1790	134	61.9365	0
Chr3	9310001	9312000	4969	Chr3	9308001	9310000	3181	272	169.649	0
Chr3	9312001	9314000	2397	Chr3	9308001	9310000	3181	125	58.8167	0
Chr3	9312001	9314000	2397	Chr3	9310001	9312000	4969	239	129.881	0
Chr3	9356001	9358000	3571	Chr3	9354001	9356000	2479	230	101.512	0
Chr3	9394001	9396000	1183	Chr3	9378001	9380000	1789	36	6.56391	0
Chr3	9392001	9394000	2511	Chr3	9380001	9382000	4454	110	43.9449	0
Chr3	9394001	9396000	1183	Chr3	9380001	9382000	4454	64	18.4263	0
Chr3	9398001	9400000	1045	Chr3	9380001	9382000	4454	51	12.8738	0
Chr3	9408001	9410000	1777	Chr3	9380001	9382000	4454	52	13.184	0
Chr3	9424001	9426000	4271	Chr3	9422001	9424000	1890	189	96.6466	0
Chr3	9500001	9502000	3962	Chr3	9498001	9500000	5361	417	208.582	0
Chr3	9504001	9506000	3476	Chr3	9498001	9500000	5361	185	101.773	0
Chr3	9506001	9508000	3664	Chr3	9504001	9506000	3476	228	126.373	0
Chr3	9530001	9532000	2565	Chr3	9528001	9530000	3375	181	83.3265	0
Chr3	9538001	9540000	5798	Chr3	9536001	9538000	1593	166	86.4694	0
Chr3	9554001	9556000	3358	Chr3	9552001	9554000	4790	312	151.544	0
Chr3	9566001	9568000	4868	Chr3	9564001	9566000	3093	248	137.584	0
Chr3	9568001	9570000	4916	Chr3	9564001	9566000	3093	193	97.9685	0
Chr3	9568001	9570000	4916	Chr3	9566001	9568000	4868	363	216.044	0
Chr3	9614001	9616000	3414	Chr3	9610001	9612000	1551	101	39.01	0
Chr3	9622001	9624000	2092	Chr3	9610001	9612000	1551	49	10.7456	0
Chr3	9670001	9672000	2722	Chr3	9666001	9668000	4490	167	81.7975	0
Chr3	9670001	9672000	2722	Chr3	9668001	9670000	4345	217	112.287	0
Chr3	9688001	9690000	3530	Chr3	9686001	9688000	4494	267	151.452	0
Chr3	9704001	9706000	4121	Chr3	9686001	9688000	4494	101	39.1534	0
Chr3	9708001	9710000	4434	Chr3	9686001	9688000	4494	96	34.6138	0
Chr3	9704001	9706000	4121	Chr3	9688001	9690000	3530	86	34.3711	0
Chr3	9708001	9710000	4434	Chr3	9688001	9690000	3530	91	29.928	0
Chr3	9708001	9710000	4434	Chr3	9690001	9692000	2946	76	27.8616	0
Chr3	9744001	9746000	3688	Chr3	9690001	9692000	2946	43	6.73959	0
Chr3	9696001	9698000	2939	Chr3	9692001	9694000	3920	187	79.8442	0
Chr3	9742001	9744000	1764	Chr3	9704001	9706000	4121	41	7.32367	0
Chr3	9750001	9752000	5997	Chr3	9708001	9710000	4434	70	21.8365	0
Chr3	9744001	9746000	3688	Chr3	9718001	9720000	1355	44	8.30884	0
Chr3	9738001	9740000	1235	Chr3	9722001	9724000	3654	52	13.6055	0
Chr3	9744001	9746000	3688	Chr3	9722001	9724000	3654	81	27.016	0
Chr3	9750001	9752000	5997	Chr3	9748001	9750000	3032	309	173.445	0
Chr3	9752001	9754000	4722	Chr3	9748001	9750000	3032	189	96.4606	0
Chr3	9752001	9754000	4722	Chr3	9750001	9752000	5997	473	264.724	0
Chr3	9758001	9760000	4440	Chr3	9756001	9758000	4337	297	185.871	0
Chr3	9786001	9788000	3920	Chr3	9784001	9786000	5237	310	200.598	0
Chr3	9794001	9796000	3645	Chr3	9792001	9794000	3771	242	138.852	0
Chr3	9826001	9828000	2310	Chr3	9824001	9826000	4493	242	115.687	0
Chr3	9844001	9846000	4608	Chr3	9842001	9844000	1311	131	65.7916	0
Chr3	9962001	9964000	3792	Chr3	9960001	9962000	2299	184	94.2755	0
Chr3	10026001	10028000	4059	Chr3	10024001	10026000	5321	381	219.962	0
Chr3	10028001	10030000	3760	Chr3	10024001	10026000	5321	264	144.187	0
Chr3	10062001	10064000	2379	Chr3	10060001	10062000	2622	133	66.9522	0
Chr3	10070001	10072000	3217	Chr3	10068001	10070000	2880	181	96.8378	0
Chr3	10116001	10118000	2771	Chr3	10102001	10104000	3780	90	30.243	0
Chr3	10134001	10136000	4186	Chr3	10132001	10134000	2981	226	130.764	0
Chr3	10158001	10160000	2379	Chr3	10156001	10158000	1619	100	44.1981	0
Chr3	10196001	10198000	3309	Chr3	10194001	10196000	3744	222	131.236	0
Chr3	10208001	10210000	2907	Chr3	10194001	10196000	3744	81	31.8605	0
Chr3	10240001	10242000	2880	Chr3	10238001	10240000	1614	116	52.3452	0
Chr3	10334001	10336000	3459	Chr3	10330001	10332000	1656	107	49.811	0
Chr3	10436001	10438000	2334	Chr3	10434001	10436000	2482	151	78.0977	0
Chr3	10496001	10498000	2910	Chr3	10494001	10496000	1440	118	53.5445	0
Chr3	10580001	10582000	2661	Chr3	10578001	10580000	3104	211	106.255	0
Chr3	10596001	10598000	2942	Chr3	10594001	10596000	5675	304	188.902	0
Chr3	10598001	10600000	1787	Chr3	10594001	10596000	5675	167	82.4233	0
Chr3	10630001	10632000	4397	Chr3	10624001	10626000	4747	202	114.388	0
Chr3	10650001	10652000	3418	Chr3	10646001	10648000	3363	159	84.2346	0
Chr3	10770001	10772000	3147	Chr3	10768001	10770000	3377	221	119.831	0
Chr3	10772001	10774000	2633	Chr3	10768001	10770000	3377	138	70.7338	0
Chr3	10774001	10776000	2030	Chr3	10768001	10770000	3377	103	43.2638	0
Chr3	10788001	10790000	3559	Chr3	10786001	10788000	3517	232	134.546	0
Chr3	10888001	10890000	3693	Chr3	10886001	10888000	4558	283	181.573	0
Chr3	10890001	10892000	2819	Chr3	10886001	10888000	4558	198	97.986	0
Chr3	10920001	10922000	4917	Chr3	10918001	10920000	6257	453	306.848	0
Chr3	10922001	10924000	3012	Chr3	10918001	10920000	6257	259	134.881	0
Chr3	10924001	10926000	1485	Chr3	10918001	10920000	6257	117	53.4019	0
Chr3	10926001	10928000	1626	Chr3	10918001	10920000	6257	133	46.6384	0
Chr3	10928001	10930000	2571	Chr3	10918001	10920000	6257	131	60.9536	0
Chr3	10930001	10932000	3017	Chr3	10918001	10920000	6257	127	61.1248	0
Chr3	10954001	10956000	1538	Chr3	10918001	10920000	6257	45	11.0048	0
Chr3	10960001	10962000	1813	Chr3	10918001	10920000	6257	42	10.5997	0
Chr3	10966001	10968000	1474	Chr3	10918001	10920000	6257	35	7.13255	0
Chr3	10922001	10924000	3012	Chr3	10920001	10922000	4917	244	150.14	0
Chr3	10952001	10954000	1855	Chr3	10920001	10922000	4917	46	11.912	0
Chr3	10958001	10960000	1295	Chr3	10920001	10922000	4917	36	6.76829	0
Chr3	10966001	10968000	1474	Chr3	10920001	10922000	4917	32	5.87614	0
Chr3	11060001	11062000	4965	Chr3	11054001	11056000	1032	73	26.9632	0
Chr3	11062001	11064000	1545	Chr3	11054001	11056000	1032	43	6.69003	0
Chr3	11068001	11070000	5104	Chr3	11056001	11058000	2758	99	40.1043	0
Chr3	11066001	11068000	5157	Chr3	11058001	11060000	4750	176	96.6179	0
Chr3	11068001	11070000	5104	Chr3	11058001	11060000	4750	165	79.2967	0
Chr3	11068001	11070000	5104	Chr3	11060001	11062000	4965	193	99.7625	0
Chr3	11066001	11068000	5157	Chr3	11064001	11066000	3204	243	148.297	0
Chr3	11068001	11070000	5104	Chr3	11064001	11066000	3204	190	103.625	0
Chr3	11076001	11078000	2195	Chr3	11074001	11076000	4627	185	102.602	0
Chr3	11120001	11122000	2850	Chr3	11114001	11116000	3121	107	47.7282	0
Chr3	11118001	11120000	2895	Chr3	11116001	11118000	5168	234	142.369	0
Chr3	11120001	11122000	2850	Chr3	11116001	11118000	5168	193	99.0315	0
Chr3	11146001	11148000	4724	Chr3	11142001	11144000	1621	112	53.2229	0
Chr3	11146001	11148000	4724	Chr3	11144001	11146000	5303	399	240.652	0
Chr3	11150001	11152000	3057	Chr3	11148001	11150000	3199	180	98.041	0
Chr3	15260001	15262000	2133	Chr3	15246001	15248000	6662	73	27.6294	0
Chr3	15266001	15268000	6220	Chr3	15246001	15248000	6662	120	55.4689	0
Chr3	15270001	15272000	1649	Chr3	15248001	15250000	7154	53	14.3944	0
Chr3	15268001	15270000	5134	Chr3	15250001	15252000	7396	123	56.0339	0
Chr3	15272001	15274000	5606	Chr3	15250001	15252000	7396	111	50.5575	0
Chr3	15268001	15270000	5134	Chr3	15252001	15254000	5068	104	43.7474	0
Chr3	15268001	15270000	5134	Chr3	15254001	15256000	3306	92	33.1013	0
Chr3	15536001	15538000	4122	Chr3	15524001	15526000	4193	103	39.0377	0
Chr3	15542001	15544000	4221	Chr3	15524001	15526000	4193	79	27.6724	0
Chr3	15546001	15548000	5479	Chr3	15524001	15526000	4193	77	28.7211	0
Chr3	15548001	15550000	5267	Chr3	15528001	15530000	3995	80	28.8783	0
Chr3	15552001	15554000	4042	Chr3	15528001	15530000	3995	58	18.3234	0
Chr3	15548001	15550000	5267	Chr3	15532001	15534000	4291	99	38.6893	0
Chr3	15546001	15548000	5479	Chr3	15534001	15536000	3090	94	37.3164	0
Chr3	15582001	15584000	10788	Chr3	15534001	15536000	3090	52	15.0981	0
Chr3	15578001	15580000	7594	Chr3	15568001	15570000	6213	188	98.7612	0
Chr3	15580001	15582000	10695	Chr3	15568001	15570000	6213	219	118.35	0
Chr3	15582001	15584000	10788	Chr3	15568001	15570000	6213	201	107.969	0
Chr3	15592001	15594000	6136	Chr3	15568001	15570000	6213	118	38.7486	0
Chr3	15596001	15598000	5511	Chr3	15568001	15570000	6213	105	29.2199	0
Chr3	15598001	15600000	10920	Chr3	15568001	15570000	6213	163	54.267	0
Chr3	15600001	15602000	3062	Chr3	15568001	15570000	6213	50	14.7225	0
Chr3	15576001	15578000	10816	Chr3	15570001	15572000	5943	344	203.774	0
Chr3	15580001	15582000	10695	Chr3	15570001	15572000	5943	267	131.001	0
Chr3	15582001	15584000	10788	Chr3	15570001	15572000	5943	254	114.526	0
Chr3	15592001	15594000	6136	Chr3	15570001	15572000	5943	113	40.1257	0
Chr3	15594001	15596000	4587	Chr3	15570001	15572000	5943	89	27.312	0
Chr3	15596001	15598000	5511	Chr3	15570001	15572000	5943	116	29.9448	0
Chr3	15598001	15600000	10920	Chr3	15570001	15572000	5943	166	54.7887	0
Chr3	15592001	15594000	6136	Chr3	15572001	15574000	4503	94	33.2215	0
Chr3	15594001	15596000	4587	Chr3	15572001	15574000	4503	66	22.4682	0
Chr3	15596001	15598000	5511	Chr3	15572001	15574000	4503	80	24.4931	0
Chr3	15598001	15600000	10920	Chr3	15572001	15574000	4503	117	44.6048	0
Chr3	15580001	15582000	10695	Chr3	15574001	15576000	6234	334	203.351	0
Chr3	15582001	15584000	10788	Chr3	15574001	15576000	6234	293	165.022	0
Chr3	15584001	15586000	4082	Chr3	15574001	15576000	6234	157	53.8143	0
Chr3	15592001	15594000	6136	Chr3	15574001	15576000	6234	133	50.0722	0
Chr3	15594001	15596000	4587	Chr3	15574001	15576000	6234	103	33.6391	0
Chr3	15596001	15598000	5511	Chr3	15574001	15576000	6234	102	36.4366	0
Chr3	15598001	15600000	10920	Chr3	15574001	15576000	6234	184	65.9756	0
Chr3	15600001	15602000	3062	Chr3	15574001	15576000	6234	62	17.6726	0
Chr3	15588001	15590000	2626	Chr3	15576001	15578000	10816	177	52.6328	0
Chr3	15590001	15592000	2882	Chr3	15576001	15578000	10816	123	51.4268	0
Chr3	15592001	15594000	6136	Chr3	15576001	15578000	10816	251	95.3707	0
Chr3	15594001	15596000	4587	Chr3	15576001	15578000	10816	164	63.5287	0
Chr3	15596001	15598000	5511	Chr3	15576001	15578000	10816	227	68.3538	0
Chr3	15598001	15600000	10920	Chr3	15576001	15578000	10816	246	122.977	0
Chr3	15600001	15602000	3062	Chr3	15576001	15578000	10816	109	32.753	0
Chr3	15590001	15592000	2882	Chr3	15578001	15580000	7594	102	40.4693	0
Chr3	15592001	15594000	6136	Chr3	15578001	15580000	7594	200	75.9365	0
Chr3	15594001	15596000	4587	Chr3	15578001	15580000	7594	117	49.8709	0
Chr3	15596001	15598000	5511	Chr3	15578001	15580000	7594	127	53.2042	0
Chr3	15598001	15600000	10920	Chr3	15578001	15580000	7594	199	95.0841	0
Chr3	15588001	15590000	2626	Chr3	15580001	15582000	10695	148	73.5936	0
Chr3	15592001	15594000	6136	Chr3	15580001	15582000	10695	256	120.237	0
Chr3	15594001	15596000	4587	Chr3	15580001	15582000	10695	181	79.8978	0
Chr3	15596001	15598000	5511	Chr3	15580001	15582000	10695	208	84.0379	0
Chr3	15598001	15600000	10920	Chr3	15580001	15582000	10695	298	148.917	0
Chr3	15600001	15602000	3062	Chr3	15580001	15582000	10695	99	39.1459	0
Chr3	15590001	15592000	2882	Chr3	15582001	15584000	10788	166	83.0631	0
Chr3	15592001	15594000	6136	Chr3	15582001	15584000	10788	332	144.937	0
Chr3	15594001	15596000	4587	Chr3	15582001	15584000	10788	168	92.2932	0
Chr3	15596001	15598000	5511	Chr3	15582001	15584000	10788	245	98.2223	0
Chr3	15598001	15600000	10920	Chr3	15582001	15584000	10788	287	171.601	0
Chr3	15600001	15602000	3062	Chr3	15582001	15584000	10788	129	44.727	0
Chr3	15592001	15594000	6136	Chr3	15584001	15586000	4082	136	69.2066	0
Chr3	15598001	15600000	10920	Chr3	15588001	15590000	2626	141	68.949	0
Chr3	15694001	15696000	3746	Chr3	15686001	15688000	3609	114	52.3442	0
Chr3	15742001	15744000	2643	Chr3	15692001	15694000	5474	42	9.35791	0
Chr3	15724001	15726000	3464	Chr3	15708001	15710000	5402	103	38.1404	0
Chr3	15726001	15728000	5085	Chr3	15708001	15710000	5402	142	50.1675	0
Chr3	15732001	15734000	2276	Chr3	15708001	15710000	5402	60	17.6657	0
Chr3	15726001	15728000	5085	Chr3	15714001	15716000	4634	143	62.0195	0
Chr3	15730001	15732000	1541	Chr3	15714001	15716000	4634	52	15.375	0
Chr3	15728001	15730000	2308	Chr3	15716001	15718000	4782	82	29.6355	0
Chr3	15728001	15730000	2308	Chr3	15718001	15720000	3859	74	28.3885	0
Chr3	15760001	15762000	4255	Chr3	15756001	15758000	3194	174	91.9451	0
Chr3	15764001	15766000	3664	Chr3	15756001	15758000	3194	129	49.1255	0
Chr3	15798001	15800000	3870	Chr3	15796001	15798000	2918	204	106.011	0
Chr3	15816001	15818000	1723	Chr3	15812001	15814000	4618	124	50.9311	0
Chr3	15858001	15860000	4369	Chr3	15818001	15820000	3119	43	11.042	0
Chr3	15828001	15830000	5759	Chr3	15820001	15822000	3106	159	71.3146	0
Chr3	15848001	15850000	5553	Chr3	15820001	15822000	3106	62	20.2835	0
Chr3	15850001	15852000	6818	Chr3	15824001	15826000	3494	78	30.2457	0
Chr3	15850001	15852000	6818	Chr3	15834001	15836000	1687	71	25.6271	0
Chr3	15850001	15852000	6818	Chr3	15846001	15848000	3246	230	136.534	0
Chr3	15860001	15862000	3062	Chr3	15848001	15850000	5553	108	46.7602	0
Chr3	15856001	15858000	1368	Chr3	15850001	15852000	6818	101	45.5532	0
Chr3	15862001	15864000	2937	Chr3	15850001	15852000	6818	124	55.3812	0
Chr3	15862001	15864000	2937	Chr3	15858001	15860000	4369	159	84.6841	0
Chr3	15902001	15904000	4117	Chr3	15898001	15900000	1771	124	51.7223	0
Chr3	15922001	15924000	4677	Chr3	15916001	15918000	2951	162	71.3281	0
Chr3	15920001	15922000	3163	Chr3	15918001	15920000	3769	208	110.006	0
Chr3	15922001	15924000	4677	Chr3	15918001	15920000	3769	221	114.984	0
Chr3	15924001	15926000	1802	Chr3	15918001	15920000	3769	94	35.6185	0
Chr3	15922001	15924000	4677	Chr3	15920001	15922000	3163	291	137.085	0
Chr3	15960001	15962000	5337	Chr3	15958001	15960000	4081	326	192.089	0
Chr3	15962001	15964000	4400	Chr3	15960001	15962000	5337	350	207.433	0
Chr3	15964001	15966000	2540	Chr3	15960001	15962000	5337	176	86.0926	0
Chr3	15966001	15968000	2580	Chr3	15960001	15962000	5337	139	70.1109	0
Chr3	15998001	16000000	6876	Chr3	15994001	15996000	3243	291	142.596	0
Chr3	15998001	16000000	6876	Chr3	15996001	15998000	4692	482	285.55	0
Chr3	16000001	16002000	3489	Chr3	15996001	15998000	4692	201	104.107	0
Chr3	16002001	16004000	1728	Chr3	15998001	16000000	6876	172	76.8334	0
Chr3	16118001	16120000	3219	Chr3	16116001	16118000	4110	248	153.406	0
Chr3	16178001	16180000	4333	Chr3	16166001	16168000	2317	88	34.0622	0
Chr3	16174001	16176000	4127	Chr3	16172001	16174000	1443	139	65.4898	0
Chr3	16178001	16180000	4333	Chr3	16174001	16176000	4127	268	136.188	0
Chr3	16210001	16212000	3869	Chr3	16200001	16202000	1705	82	27.62	0
Chr3	16210001	16212000	3869	Chr3	16206001	16208000	1178	98	37.197	0
Chr3	16210001	16212000	3869	Chr3	16208001	16210000	2109	191	93.374	0
Chr3	16232001	16234000	2443	Chr3	16230001	16232000	3436	167	91.4311	0
Chr3	16246001	16248000	7132	Chr3	16236001	16238000	3317	173	83.0095	0
Chr3	16244001	16246000	6434	Chr3	16238001	16240000	1430	108	50.1388	0
Chr3	16246001	16248000	7132	Chr3	16238001	16240000	1430	110	43.323	0
Chr3	16248001	16250000	5778	Chr3	16238001	16240000	1430	84	29.6949	0
Chr3	16244001	16246000	6434	Chr3	16242001	16244000	1388	157	84.8945	0
Chr3	16246001	16248000	7132	Chr3	16242001	16244000	1388	148	65.2893	0
Chr3	16248001	16250000	5778	Chr3	16242001	16244000	1388	102	42.589	0
Chr3	16252001	16254000	1965	Chr3	16244001	16246000	6434	131	54.8298	0
Chr3	16252001	16254000	1965	Chr3	16246001	16248000	7132	171	75.8121	0
Chr3	16256001	16258000	1232	Chr3	16246001	16248000	7132	81	32.2866	0
Chr3	16288001	16290000	3710	Chr3	16286001	16288000	2664	200	111.39	0
Chr3	16290001	16292000	2816	Chr3	16288001	16290000	3710	205	116.006	0
Chr3	16336001	16338000	4250	Chr3	16330001	16332000	1994	121	49.4126	0
Chr3	16338001	16340000	5099	Chr3	16330001	16332000	1994	129	46.912	0
Chr3	16390001	16392000	5345	Chr3	16388001	16390000	4571	329	196.051	0
Chr3	16398001	16400000	5197	Chr3	16392001	16394000	6336	245	149.006	0
Chr3	16398001	16400000	5197	Chr3	16396001	16398000	5248	345	226.628	0
Chr3	16402001	16404000	5504	Chr3	16398001	16400000	5197	322	175.527	0
Chr3	16478001	16480000	5507	Chr3	16476001	16478000	3249	285	175.986	0
Chr3	16500001	16502000	5875	Chr3	16496001	16498000	1138	111	44.3981	0
Chr3	16594001	16596000	5095	Chr3	16590001	16592000	5977	339	209.108	0
Chr3	16666001	16668000	3657	Chr3	16664001	16666000	4438	231	137.761	0
Chr3	16702001	16704000	3393	Chr3	16692001	16694000	4386	111	50.8843	0
Chr3	22514001	22516000	9865	Chr3	16710001	16712000	2426	20	0.186597	0
Chr3	22514001	22516000	9865	Chr3	16712001	16714000	1869	24	0.143288	0
Chr3	22516001	22518000	7437	Chr3	16712001	16714000	1869	17	0.108372	0
Chr3	22514001	22516000	9865	Chr3	16714001	16716000	1993	30	0.151301	0
Chr3	22516001	22518000	7437	Chr3	16714001	16716000	1993	38	0.114432	0
Chr3	22518001	22520000	7516	Chr3	16714001	16716000	1993	37	0.117965	0
Chr3	22520001	22522000	7386	Chr3	16714001	16716000	1993	20	0.120807	0
Chr3	22580001	22582000	3518	Chr3	16714001	16716000	1993	17	0.068161	0
Chr3	16718001	16720000	4130	Chr3	16716001	16718000	4501	277	173.664	0
Chr3	22512001	22514000	4181	Chr3	16716001	16718000	4501	18	0.14668	0
Chr3	22514001	22516000	9865	Chr3	16716001	16718000	4501	53	0.336653	0
Chr3	22516001	22518000	7437	Chr3	16716001	16718000	4501	35	0.254618	0
Chr3	22518001	22520000	7516	Chr3	16716001	16718000	4501	41	0.262478	0
Chr3	22520001	22522000	7386	Chr3	16716001	16718000	4501	29	0.268801	0
Chr3	22572001	22574000	4126	Chr3	16716001	16718000	4501	19	0.170316	0
Chr3	22574001	22576000	2431	Chr3	16716001	16718000	4501	18	0.101215	0
Chr3	22576001	22578000	3103	Chr3	16716001	16718000	4501	25	0.130326	0
Chr3	22578001	22580000	2257	Chr3	16716001	16718000	4501	37	0.095974	0
Chr3	22580001	22582000	3518	Chr3	16716001	16718000	4501	61	0.151662	0
Chr3	22582001	22584000	2201	Chr3	16716001	16718000	4501	24	0.097923	0
Chr3	22514001	22516000	9865	Chr3	16718001	16720000	4130	27	0.310015	0
Chr3	22516001	22518000	7437	Chr3	16718001	16720000	4130	29	0.234471	0
Chr3	22518001	22520000	7516	Chr3	16718001	16720000	4130	26	0.241709	0
Chr3	22520001	22522000	7386	Chr3	16718001	16720000	4130	18	0.247531	0
Chr3	22572001	22574000	4126	Chr3	16718001	16720000	4130	15	0.15684	0
Chr3	22578001	22580000	2257	Chr3	16718001	16720000	4130	16	0.088379	0
Chr3	22580001	22582000	3518	Chr3	16718001	16720000	4130	33	0.139662	0
Chr3	16766001	16768000	3162	Chr3	16762001	16764000	4461	163	84.9656	0
Chr3	16770001	16772000	5692	Chr3	16764001	16766000	3709	188	98.5689	0
Chr3	16772001	16774000	2683	Chr3	16770001	16772000	5692	220	128.674	0
Chr3	16784001	16786000	4438	Chr3	16782001	16784000	4671	300	175.239	0
Chr3	16836001	16838000	4804	Chr3	16828001	16830000	3308	138	66.768	0
Chr3	16836001	16838000	4804	Chr3	16834001	16836000	3007	248	135.756	0
Chr3	16868001	16870000	3418	Chr3	16866001	16868000	3334	187	100.729	0
Chr3	16870001	16872000	5411	Chr3	16866001	16868000	3334	194	111.087	0
Chr3	16874001	16876000	3465	Chr3	16872001	16874000	3913	213	119.021	0
Chr3	16890001	16892000	3254	Chr3	16888001	16890000	4138	217	128.095	0
Chr3	16940001	16942000	1029	Chr3	16936001	16938000	2916	63	21.6618	0
Chr3	16954001	16956000	3473	Chr3	16952001	16954000	3682	205	118.144	0
Chr3	16996001	16998000	1384	Chr3	16986001	16988000	4994	71	26.0685	0
Chr3	17042001	17044000	4754	Chr3	17026001	17028000	1337	57	16.5802	0
Chr3	17056001	17058000	2997	Chr3	17054001	17056000	2146	141	73.1522	0
Chr3	17124001	17126000	7717	Chr3	17096001	17098000	2223	65	22.7636	0
Chr3	17124001	17126000	7717	Chr3	17098001	17100000	799	38	9.04996	0
Chr3	17124001	17126000	7717	Chr3	17102001	17104000	1576	68	21.5218	0
Chr3	17124001	17126000	7717	Chr3	17120001	17122000	1421	160	72.9832	0
Chr3	17126001	17128000	2179	Chr3	17124001	17126000	7717	266	150.33	0
Chr3	17130001	17132000	3280	Chr3	17128001	17130000	4871	249	145.253	0
Chr3	17154001	17156000	4657	Chr3	17152001	17154000	1672	160	78.5576	0
Chr3	17184001	17186000	2530	Chr3	17182001	17184000	5534	231	129.221	0
Chr3	17240001	17242000	3494	Chr3	17234001	17236000	4325	150	73.3511	0
Chr3	17240001	17242000	3494	Chr3	17236001	17238000	3124	144	67.9606	0
Chr3	17280001	17282000	3733	Chr3	17278001	17280000	3457	215	118.455	0
Chr3	17292001	17294000	3845	Chr3	17290001	17292000	3959	258	132.118	0
Chr3	17294001	17296000	2492	Chr3	17290001	17292000	3959	129	60.8101	0
Chr3	17296001	17298000	3865	Chr3	17290001	17292000	3959	151	74.8049	0
Chr3	17296001	17298000	3865	Chr3	17292001	17294000	3845	181	92.6803	0
Chr3	17314001	17316000	4945	Chr3	17312001	17314000	3627	261	146.626	0
Chr3	17330001	17332000	4681	Chr3	17322001	17324000	4727	181	76.7107	0
Chr3	17330001	17332000	4681	Chr3	17324001	17326000	4991	190	102.304	0
Chr3	17354001	17356000	3212	Chr3	17352001	17354000	3848	234	121.027	0
Chr3	17392001	17394000	4475	Chr3	17388001	17390000	2051	140	71.4831	0
Chr3	17394001	17396000	3209	Chr3	17390001	17392000	2675	140	66.8048	0
Chr3	17394001	17396000	3209	Chr3	17392001	17394000	4475	267	157.419	0
Chr3	17482001	17484000	3881	Chr3	17466001	17468000	5988	129	54.2995	0
Chr3	17484001	17486000	3621	Chr3	17466001	17468000	5988	119	45.0653	0
Chr3	17474001	17476000	1370	Chr3	17472001	17474000	3793	124	53.8503	0
Chr3	17484001	17486000	3621	Chr3	17482001	17484000	3881	228	137.858	0
Chr3	17518001	17520000	3275	Chr3	17514001	17516000	4624	189	106.207	0
Chr3	17562001	17564000	2382	Chr3	17550001	17552000	2244	64	17.9788	0
Chr3	17572001	17574000	6520	Chr3	17570001	17572000	2298	254	140.53	0
Chr3	17574001	17576000	3520	Chr3	17572001	17574000	6520	331	212.421	0
Chr3	17628001	17630000	4040	Chr3	17624001	17626000	2812	154	75.4411	0
Chr3	17638001	17640000	2150	Chr3	17636001	17638000	4064	165	83.4185	0
Chr3	17664001	17666000	5131	Chr3	17662001	17664000	2875	211	123.032	0
Chr3	17670001	17672000	3358	Chr3	17664001	17666000	5131	162	78.1721	0
Chr3	17722001	17724000	7176	Chr3	17720001	17722000	2288	231	137.655	0
Chr3	17724001	17726000	6646	Chr3	17720001	17722000	2288	166	90.0222	0
Chr3	17724001	17726000	6646	Chr3	17722001	17724000	7176	549	391.319	0
Chr3	17726001	17728000	2361	Chr3	17722001	17724000	7176	193	100.789	0
Chr3	17874001	17876000	3604	Chr3	17872001	17874000	3259	204	106.396	0
Chr3	17892001	17894000	3563	Chr3	17890001	17892000	2292	163	76.8053	0
Chr3	17924001	17926000	4620	Chr3	17920001	17922000	2605	151	75.797	0
Chr3	17926001	17928000	3845	Chr3	17920001	17922000	2605	117	50.2487	0
Chr3	17924001	17926000	4620	Chr3	17922001	17924000	5260	414	213.477	0
Chr3	17926001	17928000	3845	Chr3	17922001	17924000	5260	239	126.61	0
Chr3	17968001	17970000	3520	Chr3	17966001	17968000	2469	164	87.1221	0
Chr3	17984001	17986000	2898	Chr3	17978001	17980000	1662	81	26.4483	0
Chr3	17984001	17986000	2898	Chr3	17980001	17982000	2858	134	57.595	0
Chr3	18002001	18004000	4464	Chr3	17990001	17992000	2260	88	30.7366	0
Chr3	18008001	18010000	4927	Chr3	18006001	18008000	1903	163	88.4837	0
Chr3	18026001	18028000	3184	Chr3	18024001	18026000	3310	212	103.038	0
Chr3	18072001	18074000	2589	Chr3	18050001	18052000	3132	53	15.7809	0
Chr3	18100001	18102000	3567	Chr3	18098001	18100000	3409	209	121.874	0
Chr3	18128001	18130000	4601	Chr3	18126001	18128000	1653	147	72.0328	0
Chr3	18150001	18152000	3223	Chr3	18148001	18150000	5902	302	178.845	0
Chr3	18188001	18190000	3485	Chr3	18186001	18188000	3721	223	127.186	0
Chr3	18228001	18230000	4224	Chr3	18226001	18228000	4549	273	171.902	0
Chr3	18528001	18530000	2588	Chr3	18522001	18524000	4468	144	66.3643	0
Chr3	18666001	18668000	3718	Chr3	18664001	18666000	2708	193	97.3674	0
Chr3	18778001	18780000	6164	Chr3	18774001	18776000	2874	239	116.236	0
Chr3	18796001	18798000	1278	Chr3	18792001	18794000	4368	115	41.4554	0
Chr3	18826001	18828000	3177	Chr3	18814001	18816000	1443	52	16.0073	0
Chr3	18930001	18932000	4606	Chr3	18928001	18930000	2054	193	93.1625	0
Chr3	18938001	18940000	4056	Chr3	18936001	18938000	4154	274	153.363	0
Chr3	18966001	18968000	2048	Chr3	18964001	18966000	4730	181	96.1706	0
Chr3	18986001	18988000	7750	Chr3	18984001	18986000	3093	315	201.123	0
Chr3	18988001	18990000	4101	Chr3	18986001	18988000	7750	442	265.099	0
Chr3	19066001	19068000	3283	Chr3	19060001	19062000	3354	120	53.9245	0
Chr3	19098001	19100000	4006	Chr3	19092001	19094000	3194	127	60.7682	0
Chr3	19106001	19108000	7166	Chr3	19092001	19094000	3194	132	51.9282	0
Chr3	19106001	19108000	7166	Chr3	19094001	19096000	2089	90	37.9413	0
Chr3	19106001	19108000	7166	Chr3	19098001	19100000	4006	181	100.927	0
Chr3	19104001	19106000	4819	Chr3	19100001	19102000	3140	161	85.8469	0
Chr3	19106001	19108000	7166	Chr3	19100001	19102000	3140	252	99.7088	0
Chr3	19106001	19108000	7166	Chr3	19102001	19104000	2833	237	113.516	0
Chr3	19106001	19108000	7166	Chr3	19104001	19106000	4819	398	270.014	0
Chr3	19118001	19120000	6320	Chr3	19114001	19116000	2339	160	84.9387	0
Chr3	19120001	19122000	3016	Chr3	19118001	19120000	6320	262	153.646	0
Chr3	19128001	19130000	2635	Chr3	19122001	19124000	4235	114	52.2032	0
Chr3	19202001	19204000	5272	Chr3	19200001	19202000	3931	348	192.974	0
Chr3	19228001	19230000	2074	Chr3	19226001	19228000	3197	137	68.8387	0
Chr3	19272001	19274000	4105	Chr3	19270001	19272000	2615	208	107.023	0
Chr3	19316001	19318000	5630	Chr3	19314001	19316000	3861	296	184.923	0
Chr3	19352001	19354000	1832	Chr3	19344001	19346000	4452	93	35.496	0
Chr3	19380001	19382000	3600	Chr3	19376001	19378000	3037	159	71.6104	0
Chr3	19382001	19384000	3586	Chr3	19380001	19382000	3600	209	120.179	0
Chr3	19436001	19438000	2296	Chr3	19434001	19436000	4419	213	104.776	0
Chr3	19508001	19510000	4628	Chr3	19506001	19508000	3120	240	140.72	0
Chr3	19534001	19536000	4405	Chr3	19530001	19532000	1603	120	57.9308	0
Chr3	19592001	19594000	4273	Chr3	19590001	19592000	2302	184	102.503	0
Chr3	19610001	19612000	5372	Chr3	19606001	19608000	1475	116	54.7847	0
Chr3	19610001	19612000	5372	Chr3	19608001	19610000	4130	360	213.471	0
Chr3	19614001	19616000	2084	Chr3	19610001	19612000	5372	151	77.8857	0
Chr3	19658001	19660000	2062	Chr3	19656001	19658000	3820	150	77.5914	0
Chr3	19664001	19666000	3933	Chr3	19662001	19664000	4242	260	162.796	0
Chr3	19678001	19680000	3165	Chr3	19662001	19664000	4242	88	32.8719	0
Chr3	19704001	19706000	2359	Chr3	19702001	19704000	4238	188	101.067	0
Chr3	19738001	19740000	3055	Chr3	19736001	19738000	4742	234	141.048	0
Chr3	19746001	19748000	2428	Chr3	19744001	19746000	5234	213	124.613	0
Chr3	19750001	19752000	1690	Chr3	19744001	19746000	5234	112	48.5177	0
Chr3	19774001	19776000	2644	Chr3	19772001	19774000	4872	223	126.59	0
Chr3	19796001	19798000	2662	Chr3	19794001	19796000	3542	174	85.4291	0
Chr3	19800001	19802000	3394	Chr3	19798001	19800000	3979	208	122.689	0
Chr3	19810001	19812000	4235	Chr3	19798001	19800000	3979	107	49.0338	0
Chr3	19802001	19804000	3157	Chr3	19800001	19802000	3394	176	98.5709	0
Chr3	19810001	19812000	4235	Chr3	19800001	19802000	3394	108	49.3365	0
Chr3	19812001	19814000	1802	Chr3	19810001	19812000	4235	148	76.9339	0
Chr3	19858001	19860000	1704	Chr3	19848001	19850000	4033	76	24.4593	0
Chr3	19872001	19874000	2081	Chr3	19868001	19870000	2575	96	38.5218	0
Chr3	19920001	19922000	3836	Chr3	19916001	19918000	4147	213	99.0113	0
Chr3	19920001	19922000	3836	Chr3	19918001	19920000	3033	190	102.338	0
Chr3	19932001	19934000	6819	Chr3	19930001	19932000	2881	295	165.058	0
Chr3	19934001	19936000	3650	Chr3	19932001	19934000	6819	376	210.743	0
Chr3	19942001	19944000	3392	Chr3	19940001	19942000	3688	192	110.512	0
Chr3	19954001	19956000	3525	Chr3	19952001	19954000	3926	223	123.921	0
Chr3	19980001	19982000	2150	Chr3	19976001	19978000	6262	164	84.8523	0
Chr3	20018001	20020000	2928	Chr3	20016001	20018000	4735	220	127.967	0
Chr3	20020001	20022000	2993	Chr3	20016001	20018000	4735	184	92.3841	0
Chr3	20076001	20078000	2744	Chr3	20074001	20076000	4428	219	113.612	0
Chr3	20084001	20086000	2714	Chr3	20080001	20082000	4390	163	80.936	0
Chr3	20124001	20126000	2640	Chr3	20122001	20124000	3713	180	99.7384	0
Chr3	20146001	20148000	4219	Chr3	20144001	20146000	2669	208	104.948	0
Chr3	20164001	20166000	4186	Chr3	20162001	20164000	3899	247	148.921	0
Chr3	20186001	20188000	1253	Chr3	20180001	20182000	4651	82	33.1573	0
Chr3	20216001	20218000	2359	Chr3	20212001	20214000	4513	147	75.8578	0
Chr3	20228001	20230000	4359	Chr3	20226001	20228000	2722	245	117.951	0
Chr3	20282001	20284000	5452	Chr3	20278001	20280000	2550	173	94.5151	0
Chr3	20282001	20284000	5452	Chr3	20280001	20282000	4092	334	212.794	0
Chr3	20334001	20336000	2361	Chr3	20330001	20332000	4926	185	85.6201	0
Chr3	20336001	20338000	1748	Chr3	20330001	20332000	4926	122	50.064	0
Chr3	20366001	20368000	3751	Chr3	20362001	20364000	1997	139	52.884	0
Chr3	20366001	20368000	3751	Chr3	20364001	20366000	3151	233	117.455	0
Chr3	20422001	20424000	1862	Chr3	20416001	20418000	5348	113	50.765	0
Chr3	20422001	20424000	1862	Chr3	20420001	20422000	5488	185	92.6697	0
Chr3	20426001	20428000	4867	Chr3	20424001	20426000	3852	300	170.624	0
Chr3	20436001	20438000	1994	Chr3	20434001	20436000	7259	226	133.26	0
Chr3	20504001	20506000	2097	Chr3	20502001	20504000	2420	115	53.4966	0
Chr3	20544001	20546000	4101	Chr3	20542001	20544000	5572	355	217.979	0
Chr3	20588001	20590000	1584	Chr3	20574001	20576000	4496	64	21.2283	0
Chr3	20586001	20588000	1639	Chr3	20584001	20586000	3994	147	72.3168	0
Chr3	20588001	20590000	1584	Chr3	20584001	20586000	3994	129	49.7096	0
Chr3	20600001	20602000	4131	Chr3	20598001	20600000	2309	183	102.329	0
Chr3	20648001	20650000	4197	Chr3	20644001	20646000	1288	109	44.3119	0
Chr3	20650001	20652000	3156	Chr3	20646001	20648000	2148	121	56.2741	0
Chr3	20650001	20652000	3156	Chr3	20648001	20650000	4197	302	155.273	0
Chr3	20706001	20708000	2960	Chr3	20704001	20706000	2339	163	72.7215	0
Chr3	20718001	20720000	3481	Chr3	20714001	20716000	3337	157	82.7315	0
Chr3	20732001	20734000	2894	Chr3	20730001	20732000	2559	177	82.977	0
Chr3	20822001	20824000	5638	Chr3	20820001	20822000	2312	227	118.764	0
Chr3	20830001	20832000	4141	Chr3	20828001	20830000	4924	286	179.274	0
Chr3	20900001	20902000	4782	Chr3	20898001	20900000	1682	155	80.2672	0
Chr3	20918001	20920000	3613	Chr3	20916001	20918000	4024	251	145.886	0
Chr3	20920001	20922000	2730	Chr3	20916001	20918000	4024	152	77.8867	0
Chr3	21088001	21090000	4612	Chr3	21080001	21082000	2586	111	51.7719	0
Chr3	21088001	21090000	4612	Chr3	21082001	21084000	4439	217	112.242	0
Chr3	21090001	21092000	1965	Chr3	21082001	21084000	4439	98	38.5096	0
Chr3	21112001	21114000	2176	Chr3	21102001	21104000	3521	77	29.6972	0
Chr3	21120001	21122000	4464	Chr3	21116001	21118000	2728	166	86.1797	0
Chr3	21182001	21184000	5327	Chr3	21176001	21178000	2003	123	60.6639	0
Chr3	21182001	21184000	5327	Chr3	21178001	21180000	1576	137	60.7632	0
Chr3	21182001	21184000	5327	Chr3	21180001	21182000	1968	187	106.659	0
Chr3	21320001	21322000	4815	Chr3	21316001	21318000	1974	132	66.6622	0
Chr3	21606001	21608000	1660	Chr3	21584001	21586000	3786	51	12.9556	0
Chr3	21698001	21700000	3260	Chr3	21696001	21698000	3517	284	119.608	0
Chr3	21734001	21736000	3467	Chr3	21732001	21734000	3511	259	125.049	0
Chr3	21766001	21768000	5334	Chr3	21764001	21766000	3330	265	165.007	0
Chr3	21826001	21828000	3038	Chr3	21824001	21826000	3927	233	119.18	0
Chr3	21878001	21880000	3129	Chr3	21874001	21876000	3772	178	91.3996	0
Chr3	22004001	22006000	4216	Chr3	21996001	21998000	2548	109	50.4202	0
Chr3	22070001	22072000	4603	Chr3	22068001	22070000	3140	251	147.245	0
Chr3	22126001	22128000	2443	Chr3	22124001	22126000	3078	170	86.8341	0
Chr3	22162001	22164000	2899	Chr3	22160001	22162000	3296	185	98.481	0
Chr3	22240001	22242000	4057	Chr3	22234001	22236000	4824	215	112.497	0
Chr3	22280001	22282000	2352	Chr3	22274001	22276000	3791	108	50.0547	0
Chr3	22330001	22332000	4906	Chr3	22316001	22318000	3489	105	46.8242	0
Chr3	22516001	22518000	7437	Chr3	22364001	22366000	1372	23	1.96407	0
Chr3	22518001	22520000	7516	Chr3	22364001	22366000	1372	21	1.99841	0
Chr3	22412001	22414000	3347	Chr3	22410001	22412000	6042	339	214.348	0
Chr3	22486001	22488000	2982	Chr3	22484001	22486000	7840	316	198.702	0
Chr3	22488001	22490000	2403	Chr3	22484001	22486000	7840	204	114.544	0
Chr3	22490001	22492000	3327	Chr3	22484001	22486000	7840	236	125.129	0
Chr3	22508001	22510000	4986	Chr3	22504001	22506000	2930	198	89.418	0
Chr3	22546001	22548000	5255	Chr3	22504001	22506000	2930	48	11.8744	0
Chr3	22582001	22584000	2201	Chr3	22508001	22510000	4986	37	4.8386	0
Chr3	22594001	22596000	3609	Chr3	22508001	22510000	4986	34	6.71587	0
Chr3	22516001	22518000	7437	Chr3	22512001	22514000	4181	274	166.778	0
Chr3	22518001	22520000	7516	Chr3	22512001	22514000	4181	263	135.216	0
Chr3	22520001	22522000	7386	Chr3	22512001	22514000	4181	210	109.465	0
Chr3	22578001	22580000	2257	Chr3	22512001	22514000	4181	30	4.37679	0
Chr3	22580001	22582000	3518	Chr3	22512001	22514000	4181	61	6.68153	0
Chr3	22582001	22584000	2201	Chr3	22512001	22514000	4181	57	4.17078	0
Chr3	22516001	22518000	7437	Chr3	22514001	22516000	9865	919	544.027	0
Chr3	22518001	22520000	7516	Chr3	22514001	22516000	9865	858	394.596	0
Chr3	22520001	22522000	7386	Chr3	22514001	22516000	9865	644	317.816	0
Chr3	22548001	22550000	3205	Chr3	22514001	22516000	9865	97	28.7655	0
Chr3	22574001	22576000	2431	Chr3	22514001	22516000	9865	44	11.801	0
Chr3	22576001	22578000	3103	Chr3	22514001	22516000	9865	86	14.6726	0
Chr3	22578001	22580000	2257	Chr3	22514001	22516000	9865	108	10.4129	0
Chr3	22580001	22582000	3518	Chr3	22514001	22516000	9865	204	15.8743	0
Chr3	22582001	22584000	2201	Chr3	22514001	22516000	9865	185	9.90135	0
Chr3	22594001	22596000	3609	Chr3	22514001	22516000	9865	57	13.5093	0
Chr3	22518001	22520000	7516	Chr3	22516001	22518000	7437	674	424.16	0
Chr3	22520001	22522000	7386	Chr3	22516001	22518000	7437	476	305.631	0
Chr3	22576001	22578000	3103	Chr3	22516001	22518000	7437	78	11.4923	0
Chr3	22578001	22580000	2257	Chr3	22516001	22518000	7437	60	8.17212	0
Chr3	22580001	22582000	3518	Chr3	22516001	22518000	7437	164	12.4453	0
Chr3	22582001	22584000	2201	Chr3	22516001	22518000	7437	145	7.7519	0
Chr3	22576001	22578000	3103	Chr3	22518001	22520000	7516	69	12.3164	0
Chr3	22578001	22580000	2257	Chr3	22518001	22520000	7516	65	8.72432	0
Chr3	22580001	22582000	3518	Chr3	22518001	22520000	7516	155	13.3126	0
Chr3	22582001	22584000	2201	Chr3	22518001	22520000	7516	129	8.2835	0
Chr3	22594001	22596000	3609	Chr3	22518001	22520000	7516	52	11.1651	0
Chr3	22548001	22550000	3205	Chr3	22520001	22522000	7386	87	28.4965	0
Chr3	22572001	22574000	4126	Chr3	22520001	22522000	7386	61	18.7478	0
Chr3	22576001	22578000	3103	Chr3	22520001	22522000	7386	79	13.1407	0
Chr3	22578001	22580000	2257	Chr3	22520001	22522000	7386	68	9.28842	0
Chr3	22580001	22582000	3518	Chr3	22520001	22522000	7386	114	14.1188	0
Chr3	22582001	22584000	2201	Chr3	22520001	22522000	7386	100	8.80256	0
Chr3	22560001	22562000	2416	Chr3	22556001	22558000	3547	130	63.2651	0
Chr3	22718001	22720000	4115	Chr3	22716001	22718000	2639	228	127.021	0
Chr3	22820001	22822000	5595	Chr3	22818001	22820000	2913	269	163.282	0
Chr3	22822001	22824000	3067	Chr3	22820001	22822000	5595	278	169.005	0
Chr3	22832001	22834000	4361	Chr3	22830001	22832000	4967	340	217.835	0
Chr3	22862001	22864000	2785	Chr3	22860001	22862000	3987	204	119.025	0
Chr3	22966001	22968000	3405	Chr3	22964001	22966000	2750	212	116.759	0
Chr3	23012001	23014000	2920	Chr3	23010001	23012000	4336	221	129.582	0
Chr3	23022001	23024000	2542	Chr3	23016001	23018000	5116	150	73.2054	0
Chr3	23024001	23026000	3503	Chr3	23022001	23024000	2542	170	91.5149	0
Chr3	23044001	23046000	2713	Chr3	23042001	23044000	2923	159	84.8279	0
Chr3	23058001	23060000	4157	Chr3	23056001	23058000	2953	224	132.753	0
Chr3	23120001	23122000	2628	Chr3	23106001	23108000	2876	76	25.5703	0
Chr3	23194001	23196000	5882	Chr3	23190001	23192000	3758	271	148.721	0
Chr3	23198001	23200000	6211	Chr3	23190001	23192000	3758	177	96.2111	0
Chr3	23198001	23200000	6211	Chr3	23196001	23198000	3692	320	205.107	0
Chr3	23200001	23202000	6020	Chr3	23196001	23198000	3692	246	140.537	0
Chr3	23208001	23210000	4843	Chr3	23202001	23204000	4367	212	113.954	0
Chr3	23218001	23220000	3741	Chr3	23216001	23218000	3724	241	141.216	0
Chr3	23220001	23222000	4196	Chr3	23218001	23220000	3741	254	157.065	0
Chr3	23294001	23296000	4835	Chr3	23284001	23286000	5370	223	105.784	0
Chr3	23338001	23340000	5156	Chr3	23334001	23336000	3972	305	154.114	0
Chr3	23354001	23356000	3154	Chr3	23338001	23340000	5156	101	44.754	0
Chr3	23408001	23410000	6512	Chr3	23402001	23404000	3735	230	132.85	0
Chr3	23408001	23410000	6512	Chr3	23406001	23408000	4786	487	299.377	0
Chr3	23410001	23412000	4969	Chr3	23406001	23408000	4786	265	161.65	0
Chr3	23410001	23412000	4969	Chr3	23408001	23410000	6512	439	307.547	0
Chr3	23434001	23436000	2925	Chr3	23430001	23432000	4622	210	107.852	0
Chr3	23434001	23436000	2925	Chr3	23432001	23434000	4324	269	145.374	0
Chr3	23436001	23438000	2996	Chr3	23432001	23434000	4324	196	106.936	0
Chr4	12918001	12920000	3869	Chr4	50001	52000	3894	15	0.065738	0
Chr4	410001	412000	3493	Chr4	408001	410000	1183	156	78.9895	0
Chr4	640001	642000	2804	Chr4	626001	628000	2048	77	29.6174	0
Chr4	968001	970000	2745	Chr4	960001	962000	3589	145	71.9058	0
Chr4	1170001	1172000	2536	Chr4	1158001	1160000	4342	97	42.6856	0
Chr4	1316001	1318000	6125	Chr4	1310001	1312000	3618	263	158.495	0
Chr4	1316001	1318000	6125	Chr4	1312001	1314000	6287	499	340.279	0
Chr4	1460001	1462000	5283	Chr4	1446001	1448000	2321	146	48.6398	0
Chr4	1750001	1752000	1432	Chr4	1620001	1622000	5526	22	2.52492	0
Chr4	1758001	1760000	2058	Chr4	1620001	1622000	5526	25	3.42606	0
Chr4	1730001	1732000	1191	Chr4	1622001	1624000	5181	22	2.74617	0
Chr4	1754001	1756000	2190	Chr4	1622001	1624000	5181	28	3.61227	0
Chr4	1746001	1748000	4924	Chr4	1632001	1634000	2660	29	4.84584	0
Chr4	1744001	1746000	6386	Chr4	1638001	1640000	3153	38	7.9431	0
Chr4	5698001	5700000	2237	Chr4	5682001	5684000	4236	125	42.2325	0
Chr4	5952001	5954000	2152	Chr4	5936001	5938000	1502	53	14.5107	0
Chr4	7016001	7018000	5242	Chr4	7012001	7014000	2335	206	109.114	0
Chr4	7016001	7018000	5242	Chr4	7014001	7016000	6489	589	422.88	0
Chr4	7460001	7462000	4116	Chr4	7458001	7460000	1981	205	116.932	0
Chr4	17962001	17964000	2704	Chr4	7738001	7740000	1149	15	0.017107	0
Chr4	8782001	8784000	913	Chr4	8718001	8720000	3355	21	2.44544	0
Chr4	8940001	8942000	3121	Chr4	8762001	8764000	2861	21	2.34543	0
Chr4	9188001	9190000	1736	Chr4	9186001	9188000	2055	120	50.6757	0
Chr4	9452001	9454000	4355	Chr4	9434001	9436000	1717	72	24.0816	0
Chr4	9474001	9476000	3606	Chr4	9472001	9474000	4613	325	208.265	0
Chr4	9484001	9486000	6358	Chr4	9480001	9482000	3211	281	172.474	0
Chr4	9484001	9486000	6358	Chr4	9482001	9484000	4442	474	332.852	0
Chr4	9502001	9504000	3115	Chr4	9500001	9502000	3076	213	123.064	0
Chr4	9504001	9506000	2177	Chr4	9502001	9504000	3115	168	85.5409	0
Chr4	9514001	9516000	2619	Chr4	9508001	9510000	5949	186	103.111	0
Chr4	9514001	9516000	2619	Chr4	9510001	9512000	5794	215	126.953	0
Chr4	10318001	10320000	5418	Chr4	10312001	10314000	4633	278	175.643	0
Chr4	11206001	11208000	6701	Chr4	11036001	11038000	6740	41	9.33425	0
Chr4	15552001	15554000	6350	Chr4	11036001	11038000	6740	22	0.642454	0
Chr4	15554001	15556000	5760	Chr4	11036001	11038000	6740	31	0.582726	0
Chr4	15562001	15564000	5609	Chr4	11036001	11038000	6740	23	0.560776	0
Chr4	15564001	15566000	6142	Chr4	11036001	11038000	6740	22	0.606044	0
Chr4	15566001	15568000	3039	Chr4	11036001	11038000	6740	18	0.302755	0
Chr4	11098001	11100000	6504	Chr4	11038001	11040000	7116	110	34.3404	0
Chr4	11206001	11208000	6701	Chr4	11038001	11040000	7116	59	10.0013	0
Chr4	11208001	11210000	4656	Chr4	11038001	11040000	7116	37	6.92542	0
Chr4	11212001	11214000	2727	Chr4	11038001	11040000	7116	27	4.12286	0
Chr4	15552001	15554000	6350	Chr4	11038001	11040000	7116	22	0.680146	0
Chr4	15554001	15556000	5760	Chr4	11038001	11040000	7116	22	0.61723	0
Chr4	15562001	15564000	5609	Chr4	11038001	11040000	7116	26	0.593676	0
Chr4	15564001	15566000	6142	Chr4	11038001	11040000	7116	24	0.641599	0
Chr4	15566001	15568000	3039	Chr4	11038001	11040000	7116	15	0.320516	0
Chr4	15570001	15572000	5778	Chr4	11038001	11040000	7116	19	0.608107	0
Chr4	11096001	11098000	2225	Chr4	11042001	11044000	3687	35	7.63206	0
Chr4	11098001	11100000	6504	Chr4	11042001	11044000	3687	81	20.731	0
Chr4	11102001	11104000	4017	Chr4	11042001	11044000	3687	51	11.9013	0
Chr4	11116001	11118000	3442	Chr4	11042001	11044000	3687	36	7.61945	0
Chr4	11118001	11120000	5348	Chr4	11042001	11044000	3687	58	11.3935	0
Chr4	15552001	15554000	6350	Chr4	11042001	11044000	3687	22	0.37987	0
Chr4	15554001	15556000	5760	Chr4	11042001	11044000	3687	22	0.344122	0
Chr4	15562001	15564000	5609	Chr4	11042001	11044000	3687	28	0.3309	0
Chr4	15564001	15566000	6142	Chr4	11042001	11044000	3687	24	0.357611	0
Chr4	11098001	11100000	6504	Chr4	11044001	11046000	2273	94	13.9748	0
Chr4	11102001	11104000	4017	Chr4	11044001	11046000	2273	37	7.99071	0
Chr4	15552001	15554000	6350	Chr4	11044001	11046000	2273	19	0.245614	0
Chr4	11116001	11118000	3442	Chr4	11096001	11098000	2225	67	21.6986	0
Chr4	15552001	15554000	6350	Chr4	11096001	11098000	2225	35	0.249042	0
Chr4	15554001	15556000	5760	Chr4	11096001	11098000	2225	25	0.226005	0
Chr4	15562001	15564000	5609	Chr4	11096001	11098000	2225	32	0.217492	0
Chr4	15564001	15566000	6142	Chr4	11096001	11098000	2225	16	0.234407	0
Chr4	11206001	11208000	6701	Chr4	11098001	11100000	6504	54	15.6357	0
Chr4	11210001	11212000	4986	Chr4	11098001	11100000	6504	45	11.4743	0
Chr4	11212001	11214000	2727	Chr4	11098001	11100000	6504	32	6.31696	0
Chr4	15550001	15552000	2031	Chr4	11098001	11100000	6504	19	0.232346	0
Chr4	15552001	15554000	6350	Chr4	11098001	11100000	6504	57	0.706087	0
Chr4	15554001	15556000	5760	Chr4	11098001	11100000	6504	56	0.640773	0
Chr4	15562001	15564000	5609	Chr4	11098001	11100000	6504	53	0.616636	0
Chr4	15564001	15566000	6142	Chr4	11098001	11100000	6504	52	0.666413	0
Chr4	15566001	15568000	3039	Chr4	11098001	11100000	6504	29	0.332004	0
Chr4	11116001	11118000	3442	Chr4	11102001	11104000	4017	120	54.413	0
Chr4	11118001	11120000	5348	Chr4	11102001	11104000	4017	146	73.6549	0
Chr4	11206001	11208000	6701	Chr4	11102001	11104000	4017	47	10.1065	0
Chr4	11210001	11212000	4986	Chr4	11102001	11104000	4017	53	7.41074	0
Chr4	15550001	15552000	2031	Chr4	11102001	11104000	4017	18	0.14447	0
Chr4	15552001	15554000	6350	Chr4	11102001	11104000	4017	55	0.439037	0
Chr4	15554001	15556000	5760	Chr4	11102001	11104000	4017	62	0.398426	0
Chr4	15558001	15560000	1679	Chr4	11102001	11104000	4017	16	0.119768	0
Chr4	15562001	15564000	5609	Chr4	11102001	11104000	4017	72	0.383418	0
Chr4	15564001	15566000	6142	Chr4	11102001	11104000	4017	47	0.414368	0
Chr4	15566001	15568000	3039	Chr4	11102001	11104000	4017	20	0.207001	0
Chr4	15568001	15570000	2927	Chr4	11102001	11104000	4017	18	0.199725	0
Chr4	11206001	11208000	6701	Chr4	11104001	11106000	2087	36	5.40935	0
Chr4	15552001	15554000	6350	Chr4	11104001	11106000	2087	36	0.230216	0
Chr4	15554001	15556000	5760	Chr4	11104001	11106000	2087	22	0.20892	0
Chr4	15562001	15564000	5609	Chr4	11104001	11106000	2087	34	0.201051	0
Chr4	15564001	15566000	6142	Chr4	11104001	11106000	2087	22	0.21728	0
Chr4	15552001	15554000	6350	Chr4	11110001	11112000	3211	32	0.347564	0
Chr4	15554001	15556000	5760	Chr4	11110001	11112000	3211	25	0.315413	0
Chr4	15562001	15564000	5609	Chr4	11110001	11112000	3211	24	0.303532	0
Chr4	15564001	15566000	6142	Chr4	11110001	11112000	3211	34	0.328034	0
Chr4	15566001	15568000	3039	Chr4	11110001	11112000	3211	17	0.163872	0
Chr4	15570001	15572000	5778	Chr4	11110001	11112000	3211	15	0.311011	0
Chr4	15552001	15554000	6350	Chr4	11112001	11114000	2635	22	0.281462	0
Chr4	15554001	15556000	5760	Chr4	11112001	11114000	2635	31	0.255426	0
Chr4	15562001	15564000	5609	Chr4	11112001	11114000	2635	22	0.245805	0
Chr4	15564001	15566000	6142	Chr4	11112001	11114000	2635	22	0.265647	0
Chr4	15566001	15568000	3039	Chr4	11112001	11114000	2635	18	0.132706	0
Chr4	15552001	15554000	6350	Chr4	11114001	11116000	1743	15	0.184634	0
Chr4	15562001	15564000	5609	Chr4	11114001	11116000	1743	20	0.161244	0
Chr4	15564001	15566000	6142	Chr4	11114001	11116000	1743	25	0.17426	0
Chr4	11206001	11208000	6701	Chr4	11116001	11118000	3442	49	9.64253	0
Chr4	11210001	11212000	4986	Chr4	11116001	11118000	3442	45	7.00405	0
Chr4	15552001	15554000	6350	Chr4	11116001	11118000	3442	63	0.357892	0
Chr4	15554001	15556000	5760	Chr4	11116001	11118000	3442	59	0.324787	0
Chr4	15562001	15564000	5609	Chr4	11116001	11118000	3442	57	0.312553	0
Chr4	15564001	15566000	6142	Chr4	11116001	11118000	3442	51	0.337783	0
Chr4	15566001	15568000	3039	Chr4	11116001	11118000	3442	17	0.168742	0
Chr4	11206001	11208000	6701	Chr4	11118001	11120000	5348	75	15.2406	0
Chr4	11208001	11210000	4656	Chr4	11118001	11120000	5348	49	10.4147	0
Chr4	11210001	11212000	4986	Chr4	11118001	11120000	5348	77	11.0593	0
Chr4	15552001	15554000	6350	Chr4	11118001	11120000	5348	93	0.551572	0
Chr4	15554001	15556000	5760	Chr4	11118001	11120000	5348	89	0.50055	0
Chr4	15558001	15560000	1679	Chr4	11118001	11120000	5348	26	0.150468	0
Chr4	15562001	15564000	5609	Chr4	11118001	11120000	5348	108	0.481696	0
Chr4	15564001	15566000	6142	Chr4	11118001	11120000	5348	87	0.52058	0
Chr4	15566001	15568000	3039	Chr4	11118001	11120000	5348	32	0.26006	0
Chr4	15570001	15572000	5778	Chr4	11118001	11120000	5348	17	0.493565	0
Chr4	15552001	15554000	6350	Chr4	11120001	11122000	1807	17	0.189955	0
Chr4	15554001	15556000	5760	Chr4	11120001	11122000	1807	28	0.172384	0
Chr4	15562001	15564000	5609	Chr4	11120001	11122000	1807	27	0.165891	0
Chr4	15564001	15566000	6142	Chr4	11120001	11122000	1807	21	0.179282	0
Chr4	15564001	15566000	6142	Chr4	11124001	11126000	1545	15	0.154292	0
Chr4	15552001	15554000	6350	Chr4	11126001	11128000	3312	15	0.345123	0
Chr4	15554001	15556000	5760	Chr4	11126001	11128000	3312	16	0.313198	0
Chr4	15564001	15566000	6142	Chr4	11128001	11130000	3150	15	0.307365	0
Chr4	15554001	15556000	5760	Chr4	11130001	11132000	3714	15	0.348325	0
Chr4	15552001	15554000	6350	Chr4	11202001	11204000	2657	17	0.258514	0
Chr4	15552001	15554000	6350	Chr4	11204001	11206000	5633	15	0.532422	0
Chr4	15562001	15564000	5609	Chr4	11204001	11206000	5633	19	0.464972	0
Chr4	15564001	15566000	6142	Chr4	11204001	11206000	5633	24	0.502506	0
Chr4	15548001	15550000	2213	Chr4	11206001	11208000	6701	15	0.228982	0
Chr4	15552001	15554000	6350	Chr4	11206001	11208000	6701	36	0.625621	0
Chr4	15554001	15556000	5760	Chr4	11206001	11208000	6701	29	0.56775	0
Chr4	15562001	15564000	5609	Chr4	11206001	11208000	6701	30	0.546364	0
Chr4	15564001	15566000	6142	Chr4	11206001	11208000	6701	44	0.590468	0
Chr4	15566001	15568000	3039	Chr4	11206001	11208000	6701	16	0.294974	0
Chr4	15552001	15554000	6350	Chr4	11208001	11210000	4656	20	0.438449	0
Chr4	15554001	15556000	5760	Chr4	11208001	11210000	4656	23	0.397891	0
Chr4	15562001	15564000	5609	Chr4	11208001	11210000	4656	28	0.382904	0
Chr4	15564001	15566000	6142	Chr4	11208001	11210000	4656	18	0.413813	0
Chr4	15552001	15554000	6350	Chr4	11210001	11212000	4986	33	0.476884	0
Chr4	15554001	15556000	5760	Chr4	11210001	11212000	4986	35	0.432771	0
Chr4	15562001	15564000	5609	Chr4	11210001	11212000	4986	21	0.41647	0
Chr4	15564001	15566000	6142	Chr4	11210001	11212000	4986	38	0.450088	0
Chr4	15566001	15568000	3039	Chr4	11210001	11212000	4986	18	0.224846	0
Chr4	15552001	15554000	6350	Chr4	11212001	11214000	2727	16	0.267485	0
Chr4	15562001	15564000	5609	Chr4	11212001	11214000	2727	16	0.233599	0
Chr4	15564001	15566000	6142	Chr4	11212001	11214000	2727	23	0.252455	0
Chr4	12382001	12384000	1797	Chr4	12368001	12370000	3969	75	28.4832	0
Chr4	13026001	13028000	4688	Chr4	13006001	13008000	2830	98	32.8591	0
Chr4	13446001	13448000	4298	Chr4	13444001	13446000	1632	161	87.185	0
Chr4	13680001	13682000	3219	Chr4	13678001	13680000	1448	127	60.7106	0
Chr4	13738001	13740000	1881	Chr4	13736001	13738000	4026	193	98.8386	0
Chr4	13818001	13820000	3355	Chr4	13802001	13804000	3448	91	35.949	0
Chr4	14194001	14196000	1334	Chr4	14192001	14194000	4306	175	89.0827	0
Chr4	14398001	14400000	3291	Chr4	14386001	14388000	3092	102	40.9804	0
Chr4	14444001	14446000	2079	Chr4	14438001	14440000	4729	145	73.7392	0
Chr4	14480001	14482000	2902	Chr4	14478001	14480000	5411	288	183.682	0
Chr4	15488001	15490000	3143	Chr4	15486001	15488000	1607	139	71.9161	0
Chr4	15562001	15564000	5609	Chr4	15552001	15554000	6350	299	151.341	0
Chr4	15564001	15566000	6142	Chr4	15552001	15554000	6350	298	139.289	0
Chr4	15562001	15564000	5609	Chr4	15554001	15556000	5760	313	166.192	0
Chr4	15564001	15566000	6142	Chr4	15554001	15556000	5760	294	148.428	0
Chr4	16282001	16284000	2114	Chr4	16280001	16282000	4591	251	145.172	0
Chr4	17912001	17914000	6655	Chr4	17910001	17912000	6347	685	469.832	0
Chr4	18046001	18048000	3752	Chr4	18042001	18044000	3883	221	129.5	0
Chr4	18134001	18136000	5822	Chr4	18132001	18134000	3094	360	244.863	0
Chr4	18156001	18158000	4764	Chr4	18152001	18154000	5394	404	256.857	0
Chr4	18278001	18280000	3726	Chr4	18276001	18278000	3440	332	208.622	0
Chr4	18326001	18328000	6123	Chr4	18324001	18326000	3719	591	383.649	0
Chr5	26972001	26974000	1236	Chr5	4001	6000	2054	22	0.019351	0
Chr5	12001	14000	3044	Chr5	10001	12000	2266	223	130.183	0
Chr5	84001	86000	4613	Chr5	82001	84000	920	142	70.0449	0
Chr5	140001	142000	3820	Chr5	136001	138000	5913	299	188.873	0
Chr5	212001	214000	4694	Chr5	210001	212000	4546	383	228.868	0
Chr5	216001	218000	3186	Chr5	214001	216000	5450	341	183.546	0
Chr5	220001	222000	2411	Chr5	218001	220000	6578	279	172.901	0
Chr5	314001	316000	4409	Chr5	312001	314000	3246	326	157.557	0
Chr5	344001	346000	4473	Chr5	342001	344000	8114	595	409.098	0
Chr5	552001	554000	2469	Chr5	550001	552000	6339	296	179.223	0
Chr5	556001	558000	1740	Chr5	554001	556000	7480	259	150.942	0
Chr5	564001	566000	4248	Chr5	562001	564000	2459	231	132.926	0
Chr5	636001	638000	2911	Chr5	634001	636000	3670	213	119.938	0
Chr5	646001	648000	2429	Chr5	642001	644000	4463	167	83.1744	0
Chr5	792001	794000	5377	Chr5	788001	790000	3752	253	153.249	0
Chr5	930001	932000	4512	Chr5	928001	930000	4671	424	246.124	0
Chr5	978001	980000	4645	Chr5	974001	976000	2495	201	102.4	0
Chr5	978001	980000	4645	Chr5	976001	978000	3068	289	177.44	0
Chr5	1132001	1134000	2422	Chr5	1130001	1132000	3271	174	94.4176	0
Chr5	1166001	1168000	3611	Chr5	1162001	1164000	7052	295	185.095	0
Chr5	1200001	1202000	7212	Chr5	1196001	1198000	2890	264	154.328	0
Chr5	1248001	1250000	3544	Chr5	1244001	1246000	3649	198	103.965	0
Chr5	1314001	1316000	3714	Chr5	1312001	1314000	4610	276	173.447	0
Chr5	1316001	1318000	4885	Chr5	1312001	1314000	4610	265	159.582	0
Chr5	1326001	1328000	3823	Chr5	1324001	1326000	2981	205	115.213	0
Chr5	1350001	1352000	4840	Chr5	1348001	1350000	3376	277	166.366	0
Chr5	1462001	1464000	5630	Chr5	1460001	1462000	2632	257	143.363	0
Chr5	1528001	1530000	7624	Chr5	1524001	1526000	3537	331	190.932	0
Chr5	1528001	1530000	7624	Chr5	1526001	1528000	2632	364	197.676	0
Chr5	1534001	1536000	2786	Chr5	1532001	1534000	4466	216	127.161	0
Chr5	1610001	1612000	1565	Chr5	1608001	1610000	4202	142	72.1917	0
Chr5	1836001	1838000	4186	Chr5	1834001	1836000	4301	329	207.453	0
Chr5	1954001	1956000	1942	Chr5	1952001	1954000	5416	220	121.105	0
Chr5	1956001	1958000	2694	Chr5	1952001	1954000	5416	208	118.922	0
Chr5	2086001	2088000	2689	Chr5	2084001	2086000	6079	313	177.328	0
Chr5	2200001	2202000	5545	Chr5	2198001	2200000	2289	223	134.741	0
Chr5	2288001	2290000	2450	Chr5	2286001	2288000	4096	221	119.839	0
Chr5	2336001	2338000	5052	Chr5	2332001	2334000	3548	230	125.369	0
Chr5	2338001	2340000	5010	Chr5	2332001	2334000	3548	190	98.2194	0
Chr5	2686001	2688000	3171	Chr5	2684001	2686000	4415	258	150.313	0
Chr5	2780001	2782000	3408	Chr5	2778001	2780000	5525	325	184.878	0
Chr5	2884001	2886000	3394	Chr5	2880001	2882000	4536	206	104.788	0
Chr5	3016001	3018000	6082	Chr5	3012001	3014000	1946	160	83.8144	0
Chr5	3136001	3138000	3506	Chr5	3132001	3134000	2811	157	81.105	0
Chr5	4794001	4796000	5308	Chr5	3250001	3252000	2707	26	0.451611	0
Chr5	4798001	4800000	5872	Chr5	3250001	3252000	2707	17	0.48941	0
Chr5	4798001	4800000	5872	Chr5	3256001	3258000	2710	15	0.488359	0
Chr5	3388001	3390000	4541	Chr5	3386001	3388000	4073	302	176.491	0
Chr5	3390001	3392000	3491	Chr5	3386001	3388000	4073	187	95.5611	0
Chr5	3426001	3428000	4565	Chr5	3424001	3426000	7470	486	306.206	0
Chr5	3682001	3684000	4770	Chr5	3680001	3682000	3152	256	154.965	0
Chr5	3756001	3758000	4311	Chr5	3754001	3756000	2877	227	127.086	0
Chr5	3778001	3780000	5887	Chr5	3776001	3778000	5274	403	279.252	0
Chr5	3850001	3852000	6676	Chr5	3848001	3850000	2048	277	146.701	0
Chr5	3962001	3964000	4077	Chr5	3960001	3962000	3508	249	147.918	0
Chr5	4058001	4060000	5511	Chr5	4056001	4058000	4529	371	233.527	0
Chr5	4104001	4106000	5684	Chr5	4102001	4104000	5097	440	274.533	0
Chr5	4174001	4176000	4623	Chr5	4170001	4172000	4576	261	155.437	0
Chr5	4174001	4176000	4623	Chr5	4172001	4174000	3735	327	179.957	0
Chr5	4224001	4226000	3759	Chr5	4222001	4224000	4812	310	200.46	0
Chr5	4258001	4260000	2726	Chr5	4256001	4258000	3061	188	89.3302	0
Chr5	4492001	4494000	2608	Chr5	4488001	4490000	5227	188	89.4581	0
Chr5	4494001	4496000	2303	Chr5	4488001	4490000	5227	132	61.9069	0
Chr5	4514001	4516000	8049	Chr5	4510001	4512000	3527	280	171.666	0
Chr5	4516001	4518000	4177	Chr5	4512001	4514000	4439	206	112.449	0
Chr5	4516001	4518000	4177	Chr5	4514001	4516000	8049	464	286.802	0
Chr5	4752001	4754000	2676	Chr5	4748001	4750000	3871	162	85.8508	0
Chr5	4796001	4798000	4558	Chr5	4786001	4788000	2274	95	38.903	0
Chr5	4798001	4800000	5872	Chr5	4786001	4788000	2274	97	42.6132	0
Chr5	4794001	4796000	5308	Chr5	4788001	4790000	3140	216	96.8896	0
Chr5	4796001	4798000	4558	Chr5	4788001	4790000	3140	134	64.5404	0
Chr5	4798001	4800000	5872	Chr5	4788001	4790000	3140	158	68.6027	0
Chr5	10310001	10312000	2709	Chr5	4788001	4790000	3140	15	0.105384	0
Chr5	10320001	10322000	2155	Chr5	4788001	4790000	3140	20	0.084801	0
Chr5	4796001	4798000	4558	Chr5	4794001	4796000	5308	484	237.349	0
Chr5	4798001	4800000	5872	Chr5	4794001	4796000	5308	431	214.799	0
Chr5	4800001	4802000	1640	Chr5	4794001	4796000	5308	118	47.9471	0
Chr5	10310001	10312000	2709	Chr5	4794001	4796000	5308	30	0.169534	0
Chr5	10312001	10314000	1904	Chr5	4794001	4796000	5308	20	0.11998	0
Chr5	10316001	10318000	965	Chr5	4794001	4796000	5308	18	0.061834	0
Chr5	10318001	10320000	739	Chr5	4794001	4796000	5308	18	0.047164	0
Chr5	10320001	10322000	2155	Chr5	4794001	4796000	5308	38	0.136533	0
Chr5	10322001	10324000	1117	Chr5	4794001	4796000	5308	18	0.070966	0
Chr5	10324001	10326000	1699	Chr5	4794001	4796000	5308	21	0.108511	0
Chr5	10330001	10332000	995	Chr5	4794001	4796000	5308	16	0.064681	0
Chr5	10334001	10336000	589	Chr5	4794001	4796000	5308	22	0.037807	0
Chr5	10336001	10338000	2084	Chr5	4794001	4796000	5308	47	0.131658	0
Chr5	10338001	10340000	963	Chr5	4794001	4796000	5308	24	0.060653	0
Chr5	4798001	4800000	5872	Chr5	4796001	4798000	4558	438	257.245	0
Chr5	4800001	4802000	1640	Chr5	4796001	4798000	4558	113	51.3712	0
Chr5	10298001	10300000	1116	Chr5	4796001	4798000	4558	15	0.059068	0
Chr5	10310001	10312000	2709	Chr5	4796001	4798000	4558	27	0.142856	0
Chr5	10320001	10322000	2155	Chr5	4796001	4798000	4558	31	0.115048	0
Chr5	10324001	10326000	1699	Chr5	4796001	4798000	4558	20	0.091436	0
Chr5	10336001	10338000	2084	Chr5	4796001	4798000	4558	26	0.110959	0
Chr5	10310001	10312000	2709	Chr5	4798001	4800000	5872	25	0.183745	0
Chr5	10312001	10314000	1904	Chr5	4798001	4800000	5872	15	0.130038	0
Chr5	10316001	10318000	965	Chr5	4798001	4800000	5872	17	0.067017	0
Chr5	10320001	10322000	2155	Chr5	4798001	4800000	5872	27	0.147978	0
Chr5	10324001	10326000	1699	Chr5	4798001	4800000	5872	19	0.117621	0
Chr5	10336001	10338000	2084	Chr5	4798001	4800000	5872	23	0.142917	0
Chr5	5152001	5154000	2312	Chr5	5150001	5152000	3925	194	100.856	0
Chr5	5198001	5200000	3588	Chr5	5196001	5198000	4827	273	172.892	0
Chr5	5394001	5396000	2941	Chr5	5392001	5394000	4186	225	125.427	0
Chr5	5422001	5424000	4157	Chr5	5404001	5406000	3405	87	36.1801	0
Chr5	5422001	5424000	4157	Chr5	5410001	5412000	2107	83	33.7766	0
Chr5	5742001	5744000	4131	Chr5	5738001	5740000	6145	274	173.151	0
Chr5	5936001	5938000	6690	Chr5	5934001	5936000	2479	296	155.738	0
Chr5	5954001	5956000	8782	Chr5	5944001	5946000	1990	134	56.7687	0
Chr5	5954001	5956000	8782	Chr5	5948001	5950000	2206	207	94.9059	0
Chr5	5954001	5956000	8782	Chr5	5950001	5952000	3680	414	198.391	0
Chr5	6146001	6148000	3375	Chr5	6144001	6146000	4228	227	136.38	0
Chr5	6220001	6222000	3263	Chr5	6218001	6220000	2975	187	101.141	0
Chr5	6228001	6230000	3086	Chr5	6226001	6228000	5279	282	162.361	0
Chr5	6308001	6310000	4696	Chr5	6306001	6308000	3325	251	145.348	0
Chr5	6346001	6348000	3481	Chr5	6344001	6346000	6140	339	191.2	0
Chr5	6406001	6408000	4204	Chr5	6402001	6404000	2521	172	78.083	0
Chr5	6408001	6410000	4259	Chr5	6402001	6404000	2521	131	61.7907	0
Chr5	6426001	6428000	3167	Chr5	6414001	6416000	5484	120	54.0609	0
Chr5	6428001	6430000	2734	Chr5	6414001	6416000	5484	105	41.5597	0
Chr5	6512001	6514000	4218	Chr5	6508001	6510000	1684	115	51.5542	0
Chr5	6620001	6622000	4268	Chr5	6618001	6620000	5498	371	230.072	0
Chr5	6622001	6624000	1210	Chr5	6618001	6620000	5498	108	46.9506	0
Chr5	6842001	6844000	1563	Chr5	6834001	6836000	8679	132	56.4244	0
Chr5	6902001	6904000	3044	Chr5	6898001	6900000	3496	158	78.7512	0
Chr5	6956001	6958000	3298	Chr5	6954001	6956000	3243	200	113.283	0
Chr5	6972001	6974000	5171	Chr5	6970001	6972000	4594	354	234.325	0
Chr5	6974001	6976000	2446	Chr5	6970001	6972000	4594	162	79.8605	0
Chr5	6974001	6976000	2446	Chr5	6972001	6974000	5171	247	128.196	0
Chr5	7010001	7012000	3154	Chr5	7002001	7004000	6048	158	79.3292	0
Chr5	7012001	7014000	6124	Chr5	7002001	7004000	6048	237	125.462	0
Chr5	7020001	7022000	2618	Chr5	7016001	7018000	5680	178	99.4361	0
Chr5	7304001	7306000	4018	Chr5	7302001	7304000	2856	222	123.761	0
Chr5	7310001	7312000	2512	Chr5	7308001	7310000	4486	212	124.065	0
Chr5	7332001	7334000	2776	Chr5	7314001	7316000	3283	72	22.6726	0
Chr5	7662001	7664000	5285	Chr5	7656001	7658000	2277	159	72.6092	0
Chr5	7662001	7664000	5285	Chr5	7658001	7660000	4725	347	188.583	0
Chr5	7662001	7664000	5285	Chr5	7660001	7662000	4067	353	230.133	0
Chr5	7718001	7720000	3466	Chr5	7696001	7698000	1697	51	14.3658	0
Chr5	7772001	7774000	4620	Chr5	7762001	7764000	4063	136	68.589	0
Chr5	7838001	7840000	3948	Chr5	7836001	7838000	3048	216	128.769	0
Chr5	8000001	8002000	4440	Chr5	7998001	8000000	3438	250	155.506	0
Chr5	8044001	8046000	3594	Chr5	8042001	8044000	3991	287	153.385	0
Chr5	8140001	8142000	4103	Chr5	8136001	8138000	1189	93	40.1327	0
Chr5	8232001	8234000	2412	Chr5	8230001	8232000	3247	175	94.6364	0
Chr5	8366001	8368000	4031	Chr5	8356001	8358000	4140	145	69.2793	0
Chr5	8576001	8578000	5440	Chr5	8572001	8574000	6900	375	255.501	0
Chr5	8578001	8580000	1031	Chr5	8572001	8574000	6900	108	39.3281	0
Chr5	8720001	8722000	580	Chr5	8716001	8718000	2170	49	13.1296	0
Chr5	8778001	8780000	2579	Chr5	8750001	8752000	3875	70	15.8341	0
Chr5	8780001	8782000	3022	Chr5	8750001	8752000	3875	64	17.1272	0
Chr5	8782001	8784000	2226	Chr5	8750001	8752000	3875	47	11.6657	0
Chr5	8778001	8780000	2579	Chr5	8752001	8754000	4697	96	20.516	0
Chr5	8780001	8782000	3022	Chr5	8752001	8754000	4697	93	21.8624	0
Chr5	8788001	8790000	3723	Chr5	8752001	8754000	4697	61	19.5193	0
Chr5	8778001	8780000	2579	Chr5	8754001	8756000	2164	44	10.3567	0
Chr5	8780001	8782000	3022	Chr5	8756001	8758000	2962	60	16.3553	0
Chr5	8778001	8780000	2579	Chr5	8758001	8760000	5247	110	30.3021	0
Chr5	8780001	8782000	3022	Chr5	8758001	8760000	5247	99	31.752	0
Chr5	8782001	8784000	2226	Chr5	8758001	8760000	5247	65	21.2311	0
Chr5	8778001	8780000	2579	Chr5	8760001	8762000	2968	65	19.5346	0
Chr5	8788001	8790000	3723	Chr5	8784001	8786000	1351	93	39.4514	0
Chr5	8892001	8894000	1807	Chr5	8888001	8890000	4983	134	68.4285	0
Chr5	8942001	8944000	1163	Chr5	8914001	8916000	3611	39	7.34317	0
Chr5	9184001	9186000	4922	Chr5	9180001	9182000	1077	102	44.2204	0
Chr5	9416001	9418000	3021	Chr5	9412001	9414000	4401	191	103.827	0
Chr5	9420001	9422000	1840	Chr5	9412001	9414000	4401	105	40.274	0
Chr5	9482001	9484000	3932	Chr5	9480001	9482000	3047	215	117.929	0
Chr5	9500001	9502000	6220	Chr5	9498001	9500000	3680	378	216.57	0
Chr5	9502001	9504000	4816	Chr5	9498001	9500000	3680	227	118.621	0
Chr5	9512001	9514000	4452	Chr5	9498001	9500000	3680	108	44.0645	0
Chr5	9502001	9504000	4816	Chr5	9500001	9502000	6220	412	279.974	0
Chr5	9504001	9506000	2396	Chr5	9500001	9502000	6220	199	99.6685	0
Chr5	9506001	9508000	2070	Chr5	9500001	9502000	6220	147	68.1314	0
Chr5	9508001	9510000	4551	Chr5	9500001	9502000	6220	212	117.891	0
Chr5	9512001	9514000	4452	Chr5	9500001	9502000	6220	169	82.3426	0
Chr5	9512001	9514000	4452	Chr5	9502001	9504000	4816	167	75.269	0
Chr5	9572001	9574000	2396	Chr5	9562001	9564000	3853	112	40.6431	0
Chr5	9572001	9574000	2396	Chr5	9564001	9566000	3454	110	44.4207	0
Chr5	9680001	9682000	5288	Chr5	9678001	9680000	3770	326	209.67	0
Chr5	9730001	9732000	1557	Chr5	9726001	9728000	3974	117	53.038	0
Chr5	9982001	9984000	4104	Chr5	9978001	9980000	1838	120	53.757	0
Chr5	9982001	9984000	4104	Chr5	9980001	9982000	3643	258	150.119	0
Chr5	9996001	9998000	6367	Chr5	9986001	9988000	3587	154	81.8631	0
Chr5	10054001	10056000	7468	Chr5	10050001	10052000	5091	392	261.192	0
Chr5	10060001	10062000	1957	Chr5	10050001	10052000	5091	104	38.0262	0
Chr5	10060001	10062000	1957	Chr5	10052001	10054000	4640	96	41.2091	0
Chr5	10060001	10062000	1957	Chr5	10054001	10056000	7468	161	83.7525	0
Chr5	10062001	10064000	1726	Chr5	10054001	10056000	7468	159	58.8011	0
Chr5	10114001	10116000	4486	Chr5	10090001	10092000	4714	91	33.706	0
Chr5	10114001	10116000	4486	Chr5	10098001	10100000	9412	179	92.8845	0
Chr5	10116001	10118000	2914	Chr5	10098001	10100000	9412	137	54.4714	0
Chr5	10120001	10122000	1222	Chr5	10098001	10100000	9412	62	19.1559	0
Chr5	10124001	10126000	1375	Chr5	10098001	10100000	9412	63	17.6699	0
Chr5	10126001	10128000	3048	Chr5	10098001	10100000	9412	91	35.0657	0
Chr5	10126001	10128000	3048	Chr5	10102001	10104000	6292	73	27.7188	0
Chr5	10116001	10118000	2914	Chr5	10104001	10106000	9053	156	75.6374	0
Chr5	10260001	10262000	4499	Chr5	10238001	10240000	1190	53	13.2054	0
Chr5	10366001	10368000	5753	Chr5	10350001	10352000	3925	124	58.931	0
Chr5	10366001	10368000	5753	Chr5	10352001	10354000	4430	152	73.5508	0
Chr5	10366001	10368000	5753	Chr5	10358001	10360000	4106	214	105.459	0
Chr5	10502001	10504000	3781	Chr5	10414001	10416000	1891	26	3.02387	0
Chr5	20168001	20170000	6232	Chr5	13368001	13370000	1733	24	0.079948	0
Chr5	13636001	13638000	1668	Chr5	13588001	13590000	5883	41	8.3769	0
Chr5	13598001	13600000	4027	Chr5	13594001	13596000	2639	173	89.863	0
Chr5	13634001	13636000	2435	Chr5	13598001	13600000	4027	52	12.75	0
Chr5	13730001	13732000	978	Chr5	13712001	13714000	4133	44	11.1256	0
Chr5	13794001	13796000	2422	Chr5	13782001	13784000	5637	118	45.994	0
Chr5	13794001	13796000	2422	Chr5	13788001	13790000	6149	184	92.3035	0
Chr5	13832001	13834000	4926	Chr5	13830001	13832000	1913	232	121.178	0
Chr5	13856001	13858000	2412	Chr5	13832001	13834000	4926	71	24.4478	0
Chr5	13854001	13856000	1637	Chr5	13834001	13836000	2716	44	11.2438	0
Chr5	13934001	13936000	3637	Chr5	13926001	13928000	3823	148	71.8914	0
Chr5	14558001	14560000	5522	Chr5	14554001	14556000	562	82	31.7728	0
Chr5	14730001	14732000	3579	Chr5	14728001	14730000	2499	212	122.695	0
Chr5	14852001	14854000	7121	Chr5	14848001	14850000	757	105	48.669	0
Chr5	14856001	14858000	2532	Chr5	14852001	14854000	7121	281	156.631	0
Chr5	14858001	14860000	2102	Chr5	14852001	14854000	7121	184	104.283	0
Chr5	15244001	15246000	3497	Chr5	15234001	15236000	6303	179	87.2028	0
Chr5	15246001	15248000	898	Chr5	15234001	15236000	6303	65	19.7822	0
Chr5	15244001	15246000	3497	Chr5	15238001	15240000	5883	209	122.593	0
Chr5	15340001	15342000	1600	Chr5	15334001	15336000	8743	171	86.5192	0
Chr5	15930001	15932000	1577	Chr5	15912001	15914000	4450	65	18.6649	0
Chr5	15924001	15926000	3836	Chr5	15920001	15922000	2691	173	84.536	0
Chr5	16046001	16048000	3919	Chr5	16042001	16044000	3449	211	108.867	0
Chr5	16046001	16048000	3919	Chr5	16044001	16046000	4272	312	189.836	0
Chr5	16348001	16350000	3231	Chr5	16346001	16348000	5807	309	196.666	0
Chr5	16350001	16352000	2261	Chr5	16346001	16348000	5807	191	98.8988	0
Chr5	16392001	16394000	1581	Chr5	16382001	16384000	5052	91	34.0192	0
Chr5	16660001	16662000	1581	Chr5	16656001	16658000	4697	126	60.9812	0
Chr5	16700001	16702000	8571	Chr5	16692001	16694000	1812	155	61.7132	0
Chr5	16702001	16704000	7195	Chr5	16692001	16694000	1812	97	42.8929	0
Chr5	16700001	16702000	8571	Chr5	16694001	16696000	4121	321	174.792	0
Chr5	16702001	16704000	7195	Chr5	16694001	16696000	4121	246	116.211	0
Chr5	16704001	16706000	6130	Chr5	16694001	16696000	4121	163	83.8209	0
Chr5	16704001	16706000	6130	Chr5	16696001	16698000	2183	115	52.9935	0
Chr5	16702001	16704000	7195	Chr5	16698001	16700000	4486	330	195.235	0
Chr5	16704001	16706000	6130	Chr5	16698001	16700000	4486	251	134.015	0
Chr5	16706001	16708000	1831	Chr5	16700001	16702000	8571	147	77.2388	0
Chr5	16796001	16798000	3997	Chr5	16794001	16796000	4544	291	177.635	0
Chr5	16804001	16806000	4314	Chr5	16802001	16804000	3972	292	167.599	0
Chr5	16824001	16826000	2036	Chr5	16820001	16822000	5297	149	74.4652	0
Chr5	17352001	17354000	2555	Chr5	17350001	17352000	4644	251	142.341	0
Chr5	17418001	17420000	1604	Chr5	17416001	17418000	3328	122	60.2104	0
Chr5	17444001	17446000	7476	Chr5	17418001	17420000	1604	60	18.0421	0
Chr5	17424001	17426000	4253	Chr5	17420001	17422000	3539	217	112.675	0
Chr5	17444001	17446000	7476	Chr5	17434001	17436000	2872	150	78.3351	0
Chr5	17444001	17446000	7476	Chr5	17438001	17440000	2105	181	85.5146	0
Chr5	17442001	17444000	5782	Chr5	17440001	17442000	7280	570	394.573	0
Chr5	17444001	17446000	7476	Chr5	17440001	17442000	7280	568	364.652	0
Chr5	17604001	17606000	2921	Chr5	17598001	17600000	3440	133	65.4554	0
Chr5	17802001	17804000	2720	Chr5	17786001	17788000	4372	90	33.5521	0
Chr5	17842001	17844000	2742	Chr5	17840001	17842000	3342	180	98.7334	0
Chr5	17860001	17862000	3622	Chr5	17858001	17860000	3958	258	151.407	0
Chr5	18152001	18154000	2621	Chr5	18142001	18144000	6780	160	69.7503	0
Chr5	18154001	18156000	2136	Chr5	18142001	18144000	6780	121	48.9068	0
Chr5	18156001	18158000	2828	Chr5	18142001	18144000	6780	141	58.0595	0
Chr5	18162001	18164000	1613	Chr5	18142001	18144000	6780	72	23.4535	0
Chr5	18222001	18224000	1907	Chr5	18206001	18208000	2535	55	15.676	0
Chr5	18454001	18456000	4667	Chr5	18452001	18454000	3449	272	167.733	0
Chr5	18794001	18796000	3764	Chr5	18792001	18794000	3715	278	175.051	0
Chr5	18914001	18916000	1444	Chr5	18912001	18914000	4149	150	79.9999	0
Chr5	18938001	18940000	2487	Chr5	18932001	18934000	2876	128	52.0561	0
Chr5	19002001	19004000	5072	Chr5	19000001	19002000	1030	142	70.9051	0
Chr5	19068001	19070000	4757	Chr5	19054001	19056000	4157	150	67.3471	0
Chr5	19184001	19186000	2094	Chr5	19172001	19174000	2687	68	20.9161	0
Chr5	19196001	19198000	3716	Chr5	19186001	19188000	2659	92	39.5816	0
Chr5	19196001	19198000	3716	Chr5	19192001	19194000	5138	242	142.415	0
Chr5	19296001	19298000	4689	Chr5	19294001	19296000	5650	403	242.03	0
Chr5	19310001	19312000	3574	Chr5	19308001	19310000	5565	290	178.646	0
Chr5	19332001	19334000	4986	Chr5	19330001	19332000	4828	339	215.028	0
Chr5	19334001	19336000	3515	Chr5	19330001	19332000	4828	196	107.369	0
Chr5	19340001	19342000	7155	Chr5	19338001	19340000	3085	305	192.343	0
Chr5	19372001	19374000	3926	Chr5	19352001	19354000	3958	70	25.934	0
Chr5	19368001	19370000	4109	Chr5	19356001	19358000	8159	160	86.2294	0
Chr5	19372001	19374000	3926	Chr5	19356001	19358000	8159	154	64.9598	0
Chr5	19368001	19370000	4109	Chr5	19358001	19360000	8576	189	107.106	0
Chr5	19476001	19478000	4475	Chr5	19434001	19436000	3596	59	16.5412	0
Chr5	19518001	19520000	4366	Chr5	19516001	19518000	3964	324	206.149	0
Chr5	19972001	19974000	6820	Chr5	19962001	19964000	2238	156	61.2642	0
Chr5	19972001	19974000	6820	Chr5	19970001	19972000	1803	224	133.767	0
Chr5	20024001	20026000	2418	Chr5	20012001	20014000	3595	81	32.5296	0
Chr5	20034001	20036000	4882	Chr5	20032001	20034000	1892	177	100.112	0
Chr5	20472001	20474000	917	Chr5	20466001	20468000	6418	105	43.9644	0
Chr5	20914001	20916000	7345	Chr5	20910001	20912000	3348	312	180.21	0
Chr5	21474001	21476000	3282	Chr5	21470001	21472000	4010	202	107.036	0
Chr5	21474001	21476000	3282	Chr5	21472001	21474000	4573	284	170.182	0
Chr5	21706001	21708000	6076	Chr5	21702001	21704000	3630	274	157.15	0
Chr5	21834001	21836000	4484	Chr5	21830001	21832000	1400	121	55.5384	0
Chr5	22044001	22046000	2311	Chr5	22040001	22042000	2518	125	53.7512	0
Chr5	22066001	22068000	2615	Chr5	22062001	22064000	4439	183	95.0723	0
Chr5	22070001	22072000	3544	Chr5	22064001	22066000	3889	165	88.7193	0
Chr5	22108001	22110000	5088	Chr5	22106001	22108000	3548	323	208.503	0
Chr5	22224001	22226000	3950	Chr5	22222001	22224000	3493	257	160.948	0
Chr5	22420001	22422000	3735	Chr5	22418001	22420000	4892	355	213.193	0
Chr5	22678001	22680000	4257	Chr5	22672001	22674000	1890	117	54.1864	0
Chr5	22698001	22700000	2489	Chr5	22696001	22698000	5670	260	164.329	0
Chr5	22762001	22764000	2153	Chr5	22760001	22762000	4287	196	108.622	0
Chr5	22770001	22772000	3363	Chr5	22768001	22770000	2766	199	113.143	0
Chr5	22782001	22784000	3645	Chr5	22780001	22782000	4105	278	175.005	0
Chr5	22872001	22874000	3903	Chr5	22868001	22870000	2450	161	87.0515	0
Chr5	23386001	23388000	5369	Chr5	23374001	23376000	2583	125	53.1869	0
Chr5	23396001	23398000	2708	Chr5	23394001	23396000	3844	218	125.917	0
Chr5	23442001	23444000	3893	Chr5	23438001	23440000	1974	128	61.3994	0
Chr5	23520001	23522000	4533	Chr5	23518001	23520000	3453	245	148.078	0
Chr5	23528001	23530000	4039	Chr5	23526001	23528000	3798	246	143.93	0
Chr5	23586001	23588000	4398	Chr5	23584001	23586000	2002	166	91.4669	0
Chr5	23622001	23624000	6643	Chr5	23620001	23622000	3299	330	196.121	0
Chr5	23634001	23636000	4919	Chr5	23630001	23632000	5016	264	150.316	0
Chr5	23664001	23666000	8094	Chr5	23662001	23664000	2838	326	209.629	0
Chr5	23666001	23668000	4450	Chr5	23664001	23666000	8094	504	330.83	0
Chr5	23696001	23698000	4596	Chr5	23694001	23696000	4538	322	211.088	0
Chr5	23802001	23804000	3006	Chr5	23800001	23802000	4264	256	138.892	0
Chr5	23914001	23916000	4086	Chr5	23908001	23910000	3806	192	96.8952	0
Chr5	24050001	24052000	4143	Chr5	24048001	24050000	3544	268	153.957	0
Chr5	24100001	24102000	1507	Chr5	24096001	24098000	6293	186	73.0002	0
Chr5	24346001	24348000	3877	Chr5	24340001	24342000	3474	167	90.8311	0
Chr5	24428001	24430000	3418	Chr5	24426001	24428000	3947	276	164.157	0
Chr5	24486001	24488000	4713	Chr5	24470001	24472000	1266	58	18.7723	0
Chr5	24486001	24488000	4713	Chr5	24472001	24474000	1549	80	26.0217	0
Chr5	24556001	24558000	2195	Chr5	24554001	24556000	3392	181	89.8433	0
Chr5	24898001	24900000	2663	Chr5	24896001	24898000	3776	219	123.045	0
Chr5	25026001	25028000	2315	Chr5	25022001	25024000	3347	143	68.0717	0
Chr5	25222001	25224000	4495	Chr5	25220001	25222000	3401	308	184.309	0
Chr5	25442001	25444000	2764	Chr5	25424001	25426000	3900	73	27.7151	0
Chr5	25760001	25762000	3389	Chr5	25758001	25760000	3786	273	148.456	0
Chr5	25800001	25802000	3890	Chr5	25798001	25800000	4125	317	191.7	0
Chr5	25808001	25810000	3265	Chr5	25806001	25808000	2446	173	95.6677	0
Chr5	25884001	25886000	4094	Chr5	25882001	25884000	3808	323	207.248	0
Chr5	26086001	26088000	5091	Chr5	26084001	26086000	3242	334	214.382	0
Chr5	26266001	26268000	5609	Chr5	26256001	26258000	1444	88	36.6597	0
Chr5	26262001	26264000	6618	Chr5	26260001	26262000	2675	347	207.441	0
Chr5	26284001	26286000	3034	Chr5	26282001	26284000	5500	388	220.034	0
Chr5	26424001	26426000	5230	Chr5	26422001	26424000	4945	402	250.025	0
Chr5	26478001	26480000	1828	Chr5	26476001	26478000	5585	224	121.691	0
Chr5	26566001	26568000	2569	Chr5	26564001	26566000	4792	265	155.918	0
Chr5	26702001	26704000	2253	Chr5	26700001	26702000	2758	173	88.6749	0
Chr5	26738001	26740000	3536	Chr5	26734001	26736000	3607	209	122.442	0
Chr5	26824001	26826000	2707	Chr5	26822001	26824000	4976	319	181.426	0
Chr5	26826001	26828000	2067	Chr5	26822001	26824000	4976	202	99.88	0
Chr5	26874001	26876000	2387	Chr5	26872001	26874000	6204	333	207.064	0
Chr5	26930001	26932000	3251	Chr5	26926001	26928000	3471	229	125.523	0
Chr5	26932001	26934000	2337	Chr5	26930001	26932000	3251	207	118.387	0
Chr5	26948001	26950000	2375	Chr5	26946001	26948000	2715	192	106.906	0
Chr5	26954001	26956000	2563	Chr5	26952001	26954000	3581	271	158.841	0
Chr5	26956001	26958000	2820	Chr5	26952001	26954000	3581	266	126.14	0
Chr1	134001	136000	2426	Chr1	132001	134000	3709	264	168.632	1e-06
Chr1	2970001	2972000	5787	Chr1	2968001	2970000	2388	263	168.417	1e-06
Chr1	3560001	3562000	1299	Chr1	3540001	3542000	7251	64	23.1125	1e-06
Chr1	4544001	4546000	1803	Chr1	4528001	4530000	4367	74	28.5665	1e-06
Chr1	5400001	5402000	3840	Chr1	5398001	5400000	4086	283	183.702	1e-06
Chr1	11512001	11514000	3920	Chr1	11502001	11504000	4187	147	78.2615	1e-06
Chr1	13518001	13520000	5173	Chr1	13502001	13504000	1885	79	31.767	1e-06
Chr1	16392001	16394000	5825	Chr1	16372001	16374000	2725	97	42.9704	1e-06
Chr1	29768001	29770000	2410	Chr1	29748001	29750000	5190	87	37.0208	1e-06
Chr2	44001	46000	1956	Chr2	14001	16000	1827	31	6.31341	1e-06
Chr2	534001	536000	1158	Chr2	530001	532000	3678	125	63.2318	1e-06
Chr2	1910001	1912000	2018	Chr2	1906001	1908000	2436	132	68.1937	1e-06
Chr2	6014001	6016000	4744	Chr2	5988001	5990000	5874	102	46.0244	1e-06
Chr2	6912001	6914000	3269	Chr2	6910001	6912000	4341	268	171.335	1e-06
Chr2	7396001	7398000	5459	Chr2	7358001	7360000	2806	55	17.7042	1e-06
Chr2	9542001	9544000	2042	Chr2	9540001	9542000	2676	149	80.0466	1e-06
Chr2	14086001	14088000	2335	Chr2	14080001	14082000	5070	154	83.1791	1e-06
Chr2	17252001	17254000	3233	Chr2	17234001	17236000	5308	114	54.4179	1e-06
Chr2	18930001	18932000	4144	Chr2	18928001	18930000	4544	358	244.991	1e-06
Chr2	19340001	19342000	4650	Chr2	19336001	19338000	2576	204	121.025	1e-06
Chr3	254001	256000	3298	Chr3	248001	250000	6608	175	98.5124	1e-06
Chr3	254001	256000	3298	Chr3	252001	254000	5506	242	149.859	1e-06
Chr3	826001	828000	2308	Chr3	824001	826000	4102	166	92.3353	1e-06
Chr3	902001	904000	3324	Chr3	888001	890000	1262	47	13.8563	1e-06
Chr3	1240001	1242000	4330	Chr3	1238001	1240000	3706	233	143.072	1e-06
Chr3	1638001	1640000	5523	Chr3	1636001	1638000	3977	304	199.32	1e-06
Chr3	2238001	2240000	4270	Chr3	2232001	2234000	3993	157	85.6728	1e-06
Chr3	3240001	3242000	4048	Chr3	3238001	3240000	3901	212	126.411	1e-06
Chr3	3242001	3244000	5010	Chr3	3238001	3240000	3901	191	110.918	1e-06
Chr3	3426001	3428000	4691	Chr3	3424001	3426000	5571	331	220.593	1e-06
Chr3	3466001	3468000	3180	Chr3	3462001	3464000	7118	214	128.748	1e-06
Chr3	3568001	3570000	3014	Chr3	3558001	3560000	5171	99	44.6027	1e-06
Chr3	3736001	3738000	4613	Chr3	3732001	3734000	3899	199	116.037	1e-06
Chr3	3954001	3956000	5591	Chr3	3950001	3952000	6163	260	163.21	1e-06
Chr3	4134001	4136000	3363	Chr3	4114001	4116000	6971	91	39.4862	1e-06
Chr3	4522001	4524000	3936	Chr3	4518001	4520000	3993	180	101.585	1e-06
Chr3	4884001	4886000	4467	Chr3	4868001	4870000	3448	78	31.211	1e-06
Chr3	4950001	4952000	4912	Chr3	4946001	4948000	3140	159	87.1687	1e-06
Chr3	5078001	5080000	2181	Chr3	5076001	5078000	3338	128	64.9055	1e-06
Chr3	5324001	5326000	2780	Chr3	5320001	5322000	3725	138	71.4963	1e-06
Chr3	5334001	5336000	2415	Chr3	5330001	5332000	4416	137	70.4351	1e-06
Chr3	5394001	5396000	4413	Chr3	5390001	5392000	3863	191	110.667	1e-06
Chr3	5522001	5524000	3744	Chr3	5520001	5522000	1566	119	59.103	1e-06
Chr3	6208001	6210000	3296	Chr3	6202001	6204000	3982	125	62.3599	1e-06
Chr3	6376001	6378000	3793	Chr3	6374001	6376000	2887	189	108.754	1e-06
Chr3	6818001	6820000	2992	Chr3	6816001	6818000	6440	255	161.556	1e-06
Chr3	7270001	7272000	4309	Chr3	7268001	7270000	2501	182	104.932	1e-06
Chr3	7514001	7516000	2862	Chr3	7498001	7500000	3999	72	27.3876	1e-06
Chr3	7628001	7630000	2293	Chr3	7624001	7626000	3913	128	64.7005	1e-06
Chr3	7800001	7802000	2483	Chr3	7798001	7800000	2868	160	88.2573	1e-06
Chr3	7902001	7904000	3488	Chr3	7892001	7894000	4124	100	45.6109	1e-06
Chr3	8140001	8142000	4043	Chr3	8138001	8140000	3802	260	164.701	1e-06
Chr3	8516001	8518000	4000	Chr3	8514001	8516000	2742	200	118.253	1e-06
Chr3	8626001	8628000	3789	Chr3	8624001	8626000	3355	201	118.845	1e-06
Chr3	8806001	8808000	6646	Chr3	8780001	8782000	3685	86	36.5645	1e-06
Chr3	8806001	8808000	6646	Chr3	8796001	8798000	1857	101	46.4647	1e-06
Chr3	8808001	8810000	810	Chr3	8806001	8808000	6646	114	56.3347	1e-06
Chr3	9254001	9256000	4091	Chr3	9248001	9250000	1790	98	43.8907	1e-06
Chr3	9506001	9508000	3664	Chr3	9498001	9500000	5361	157	85.0281	1e-06
Chr3	9704001	9706000	4121	Chr3	9690001	9692000	2946	80	32.7321	1e-06
Chr3	9750001	9752000	5997	Chr3	9690001	9692000	2946	38	9.09053	1e-06
Chr3	9694001	9696000	2797	Chr3	9692001	9694000	3920	185	106.45	1e-06
Chr3	9704001	9706000	4121	Chr3	9692001	9694000	3920	106	49.1378	1e-06
Chr3	9742001	9744000	1764	Chr3	9708001	9710000	4434	38	9.09537	1e-06
Chr3	9752001	9754000	4722	Chr3	9718001	9720000	1355	34	7.4245	1e-06
Chr3	10112001	10114000	1568	Chr3	10100001	10102000	3295	54	17.1548	1e-06
Chr3	10112001	10114000	1568	Chr3	10102001	10104000	3780	64	23.1738	1e-06
Chr3	10210001	10212000	3740	Chr3	10196001	10198000	3309	86	36.3549	1e-06
Chr3	10346001	10348000	1316	Chr3	10340001	10342000	2649	66	24.1	1e-06
Chr3	10480001	10482000	2842	Chr3	10478001	10480000	1845	131	67.0484	1e-06
Chr3	10492001	10494000	2827	Chr3	10482001	10484000	3191	94	41.6306	1e-06
Chr3	11066001	11068000	5157	Chr3	11052001	11054000	2981	92	39.6796	1e-06
Chr3	11216001	11218000	3300	Chr3	11212001	11214000	2315	127	63.7606	1e-06
Chr3	15272001	15274000	5606	Chr3	15248001	15250000	7154	99	44.5744	1e-06
Chr3	15274001	15276000	5135	Chr3	15248001	15250000	7154	89	37.8374	1e-06
Chr3	15266001	15268000	6220	Chr3	15254001	15256000	3306	99	44.6529	1e-06
Chr3	15316001	15318000	3865	Chr3	15302001	15304000	7784	135	69.748	1e-06
Chr3	15494001	15496000	5812	Chr3	15446001	15448000	4333	48	14.097	1e-06
Chr3	15556001	15558000	5251	Chr3	15532001	15534000	4291	68	25.239	1e-06
Chr3	15598001	15600000	10920	Chr3	15566001	15568000	4046	82	33.5245	1e-06
Chr3	15588001	15590000	2626	Chr3	15572001	15574000	4503	55	17.8793	1e-06
Chr3	15852001	15854000	3128	Chr3	15820001	15822000	3106	40	9.99704	1e-06
Chr3	16396001	16398000	5248	Chr3	16392001	16394000	6336	293	189.506	1e-06
Chr3	16402001	16404000	5504	Chr3	16396001	16398000	5248	228	138.081	1e-06
Chr3	16484001	16486000	1473	Chr3	16478001	16480000	5507	99	44.828	1e-06
Chr3	16500001	16502000	5875	Chr3	16484001	16486000	1473	59	20.0724	1e-06
Chr3	16752001	16754000	3248	Chr3	16748001	16750000	3201	132	67.3125	1e-06
Chr3	16960001	16962000	3958	Chr3	16958001	16960000	3869	234	143.232	1e-06
Chr3	17042001	17044000	4754	Chr3	17028001	17030000	1501	61	21.2003	1e-06
Chr3	17114001	17116000	1499	Chr3	17110001	17112000	2114	67	24.702	1e-06
Chr3	17336001	17338000	3943	Chr3	17334001	17336000	5189	267	169.329	1e-06
Chr3	17438001	17440000	3647	Chr3	17428001	17430000	2604	94	41.2676	1e-06
Chr3	17492001	17494000	2178	Chr3	17466001	17468000	5988	57	18.9092	1e-06
Chr3	17506001	17508000	1087	Chr3	17504001	17506000	4980	116	56.7586	1e-06
Chr3	17574001	17576000	3520	Chr3	17570001	17572000	2298	112	53.849	1e-06
Chr3	17666001	17668000	2952	Chr3	17662001	17664000	2875	107	49.878	1e-06
Chr3	17714001	17716000	3255	Chr3	17694001	17696000	3566	60	20.4965	1e-06
Chr3	17788001	17790000	2968	Chr3	17784001	17786000	1797	94	41.3687	1e-06
Chr3	17990001	17992000	2260	Chr3	17976001	17978000	3160	58	19.6393	1e-06
Chr3	18334001	18336000	3878	Chr3	18332001	18334000	3695	227	138.061	1e-06
Chr3	18420001	18422000	3877	Chr3	18418001	18420000	5171	308	202.601	1e-06
Chr3	18472001	18474000	3513	Chr3	18470001	18472000	1830	133	68.0317	1e-06
Chr3	18526001	18528000	1542	Chr3	18522001	18524000	4468	107	50.0011	1e-06
Chr3	18622001	18624000	2132	Chr3	18620001	18622000	5602	195	114.626	1e-06
Chr3	18778001	18780000	6164	Chr3	18772001	18774000	2482	150	79.8913	1e-06
Chr3	18780001	18782000	2088	Chr3	18778001	18780000	6164	205	122.835	1e-06
Chr3	18800001	18802000	2851	Chr3	18790001	18792000	2733	76	30.0636	1e-06
Chr3	19374001	19376000	2642	Chr3	19372001	19374000	3629	165	90.8315	1e-06
Chr3	20046001	20048000	3441	Chr3	20044001	20046000	2776	170	94.6065	1e-06
Chr3	20164001	20166000	4186	Chr3	20160001	20162000	1888	108	51.2044	1e-06
Chr3	20288001	20290000	3649	Chr3	20286001	20288000	1823	133	68.5799	1e-06
Chr3	20602001	20604000	1504	Chr3	20600001	20602000	4131	129	66.2858	1e-06
Chr3	20800001	20802000	1544	Chr3	20798001	20800000	3725	121	59.8745	1e-06
Chr3	20876001	20878000	3588	Chr3	20872001	20874000	2156	118	58.0726	1e-06
Chr3	20970001	20972000	2870	Chr3	20968001	20970000	3328	163	89.6049	1e-06
Chr3	21120001	21122000	4464	Chr3	21114001	21116000	2764	135	69.3334	1e-06
Chr3	21424001	21426000	1581	Chr3	21420001	21422000	4674	109	52.2913	1e-06
Chr3	21638001	21640000	2768	Chr3	21634001	21636000	2858	118	57.3449	1e-06
Chr3	21766001	21768000	5334	Chr3	21762001	21764000	1997	137	70.8035	1e-06
Chr3	21822001	21824000	2449	Chr3	21818001	21820000	4644	150	80.6592	1e-06
Chr3	22548001	22550000	3205	Chr3	22516001	22518000	7437	65	23.3696	1e-06
Chr3	22592001	22594000	1111	Chr3	22518001	22520000	7516	24	3.64501	1e-06
Chr3	22570001	22572000	2414	Chr3	22520001	22522000	7386	43	11.5781	1e-06
Chr3	22832001	22834000	4361	Chr3	22828001	22830000	3405	185	105.602	1e-06
Chr3	23040001	23042000	3126	Chr3	23036001	23038000	4594	177	100.225	1e-06
Chr3	23200001	23202000	6020	Chr3	23190001	23192000	3758	146	77.428	1e-06
Chr3	23326001	23328000	5758	Chr3	23324001	23326000	3660	316	208.723	1e-06
Chr3	23432001	23434000	4324	Chr3	23430001	23432000	4622	331	221.393	1e-06
Chr4	436001	438000	1897	Chr4	434001	436000	3730	211	126.851	1e-06
Chr4	962001	964000	2611	Chr4	960001	962000	3589	248	155.363	1e-06
Chr4	1168001	1170000	4177	Chr4	1160001	1162000	5884	219	131.345	1e-06
Chr4	1316001	1318000	6125	Chr4	1296001	1298000	1842	79	31.9709	1e-06
Chr4	1742001	1744000	3827	Chr4	1622001	1624000	5181	33	6.87141	1e-06
Chr4	5632001	5634000	1761	Chr4	5624001	5626000	5182	121	59.8877	1e-06
Chr4	8812001	8814000	4823	Chr4	8750001	8752000	1834	33	7.20265	1e-06
Chr4	11096001	11098000	2225	Chr4	11044001	11046000	2273	28	5.15536	1e-06
Chr4	13830001	13832000	4005	Chr4	13828001	13830000	2509	208	123.532	1e-06
Chr4	14400001	14402000	4428	Chr4	14386001	14388000	3092	105	48.3057	1e-06
Chr4	16824001	16826000	4564	Chr4	16818001	16820000	2823	172	95.8089	1e-06
Chr4	17684001	17686000	4256	Chr4	17682001	17684000	1956	225	137.944	1e-06
Chr5	54001	56000	4283	Chr5	44001	46000	1616	95	42.2656	1e-06
Chr5	792001	794000	5377	Chr5	786001	788000	1650	113	54.8112	1e-06
Chr5	2064001	2066000	3296	Chr5	2062001	2064000	1598	130	66.6613	1e-06
Chr5	2782001	2784000	4494	Chr5	2778001	2780000	5525	272	172.789	1e-06
Chr5	3264001	3266000	2901	Chr5	3260001	3262000	3693	145	77.1549	1e-06
Chr5	3686001	3688000	3082	Chr5	3682001	3684000	4770	187	107.707	1e-06
Chr5	4390001	4392000	5171	Chr5	4388001	4390000	6611	423	296.538	1e-06
Chr5	4514001	4516000	8049	Chr5	4512001	4514000	4439	427	302.106	1e-06
Chr5	4954001	4956000	1763	Chr5	4950001	4952000	5267	137	71.9902	1e-06
Chr5	5132001	5134000	3140	Chr5	5130001	5132000	3168	191	110.835	1e-06
Chr5	5422001	5424000	4157	Chr5	5406001	5408000	2228	71	27.0544	1e-06
Chr5	5796001	5798000	3043	Chr5	5794001	5796000	2377	151	81.7291	1e-06
Chr5	6438001	6440000	1967	Chr5	6432001	6434000	3356	93	40.6099	1e-06
Chr5	7330001	7332000	2674	Chr5	7314001	7316000	3283	67	24.7238	1e-06
Chr5	7426001	7428000	3562	Chr5	7406001	7408000	2745	63	21.9806	1e-06
Chr5	7532001	7534000	3423	Chr5	7530001	7532000	2244	159	87.4846	1e-06
Chr5	7658001	7660000	4725	Chr5	7656001	7658000	2277	197	116.204	1e-06
Chr5	8648001	8650000	6139	Chr5	8644001	8646000	3365	240	148.475	1e-06
Chr5	9570001	9572000	1462	Chr5	9560001	9562000	2913	57	18.948	1e-06
Chr5	9892001	9894000	6455	Chr5	9888001	9890000	3705	263	166.054	1e-06
Chr5	9928001	9930000	6761	Chr5	9914001	9916000	6911	194	112.845	1e-06
Chr5	9934001	9936000	2560	Chr5	9914001	9916000	6911	79	31.5265	1e-06
Chr5	9932001	9934000	3261	Chr5	9916001	9918000	4821	84	35.24	1e-06
Chr5	10104001	10106000	9053	Chr5	10072001	10074000	2110	61	21.1034	1e-06
Chr5	10104001	10106000	9053	Chr5	10080001	10082000	1995	70	26.7023	1e-06
Chr5	10118001	10120000	677	Chr5	10098001	10100000	9412	43	11.625	1e-06
Chr5	10354001	10356000	4262	Chr5	10350001	10352000	3925	217	130.898	1e-06
Chr5	13738001	13740000	875	Chr5	13714001	13716000	7144	44	12.1802	1e-06
Chr5	14382001	14384000	1647	Chr5	14316001	14318000	1442	21	2.71216	1e-06
Chr5	16384001	16386000	1555	Chr5	16382001	16384000	5052	164	92.0459	1e-06
Chr5	16536001	16538000	4981	Chr5	16534001	16536000	3137	277	178.279	1e-06
Chr5	17056001	17058000	2948	Chr5	17034001	17036000	1928	48	14.3784	1e-06
Chr5	17444001	17446000	7476	Chr5	17422001	17424000	2946	90	38.7371	1e-06
Chr5	17614001	17616000	3656	Chr5	17592001	17594000	3493	69	25.889	1e-06
Chr5	18034001	18036000	3904	Chr5	18032001	18034000	2069	179	102.347	1e-06
Chr5	19364001	19366000	2205	Chr5	19358001	19360000	8576	159	86.8972	1e-06
Chr5	20198001	20200000	3798	Chr5	20196001	20198000	2691	205	122.463	1e-06
Chr5	21508001	21510000	1414	Chr5	21504001	21506000	2751	85	35.906	1e-06
Chr5	22452001	22454000	1552	Chr5	22448001	22450000	3579	101	46.2211	1e-06
Chr5	23666001	23668000	4450	Chr5	23662001	23664000	2838	153	82.7291	1e-06
Chr5	23740001	23742000	2503	Chr5	23734001	23736000	3149	98	44.3113	1e-06
Chr5	24446001	24448000	4581	Chr5	24442001	24444000	1580	119	58.9503	1e-06
Chr5	24914001	24916000	2450	Chr5	24910001	24912000	2987	127	63.6468	1e-06
Chr5	25626001	25628000	4823	Chr5	25624001	25626000	3310	289	187.941	1e-06
Chr5	26262001	26264000	6618	Chr5	26256001	26258000	1444	127	64.7799	1e-06
Chr5	26866001	26868000	3862	Chr5	26864001	26866000	1100	121	60.2361	1e-06
Chr1	19726001	19728000	1516	Chr1	19722001	19724000	4016	138	73.0633	2e-06
Chr1	23806001	23808000	2080	Chr1	23804001	23806000	7172	273	178.64	2e-06
Chr1	30318001	30320000	5385	Chr1	30314001	30316000	2437	250	158.948	2e-06
Chr2	5686001	5688000	3855	Chr2	5678001	5680000	4964	174	98.9992	2e-06
Chr2	8552001	8554000	1576	Chr2	8550001	8552000	5192	199	119.901	2e-06
Chr2	10604001	10606000	3749	Chr2	10588001	10590000	2177	70	27.1048	2e-06
Chr2	11046001	11048000	1833	Chr2	11036001	11038000	4285	88	38.2737	2e-06
Chr2	14430001	14432000	3257	Chr2	14428001	14430000	3585	247	155.801	2e-06
Chr2	15100001	15102000	1217	Chr2	15090001	15092000	5064	81	33.9206	2e-06
Chr2	17334001	17336000	3687	Chr2	17332001	17334000	4691	342	233.245	2e-06
Chr3	204001	206000	2179	Chr3	202001	204000	3949	164	92.2434	2e-06
Chr3	600001	602000	4298	Chr3	596001	598000	1998	124	62.9615	2e-06
Chr3	1270001	1272000	5210	Chr3	1268001	1270000	1349	124	63.0511	2e-06
Chr3	1966001	1968000	1641	Chr3	1962001	1964000	3916	93	41.6914	2e-06
Chr3	2250001	2252000	2315	Chr3	2246001	2248000	3139	97	44.3369	2e-06
Chr3	2592001	2594000	3214	Chr3	2588001	2590000	3577	137	71.5553	2e-06
Chr3	3570001	3572000	3889	Chr3	3558001	3560000	5171	105	49.3296	2e-06
Chr3	3952001	3954000	5638	Chr3	3948001	3950000	7179	290	189.324	2e-06
Chr3	4032001	4034000	2136	Chr3	4030001	4032000	6021	192	113.264	2e-06
Chr3	4058001	4060000	3599	Chr3	4056001	4058000	4588	220	134.12	2e-06
Chr3	4700001	4702000	4674	Chr3	4694001	4696000	3060	134	69.4573	2e-06
Chr3	4770001	4772000	1779	Chr3	4766001	4768000	5079	107	51.2704	2e-06
Chr3	4784001	4786000	3509	Chr3	4768001	4770000	9087	127	64.399	2e-06
Chr3	5032001	5034000	2925	Chr3	5028001	5030000	4547	147	78.9451	2e-06
Chr3	5044001	5046000	3451	Chr3	5038001	5040000	3589	115	56.2086	2e-06
Chr3	5122001	5124000	2277	Chr3	5120001	5122000	4212	162	90.3206	2e-06
Chr3	5290001	5292000	2184	Chr3	5274001	5276000	3469	57	19.3791	2e-06
Chr3	5462001	5464000	2717	Chr3	5460001	5462000	3144	156	85.6313	2e-06
Chr3	6352001	6354000	2986	Chr3	6340001	6342000	3012	66	24.6276	2e-06
Chr3	6712001	6714000	2868	Chr3	6710001	6712000	1957	110	53.1603	2e-06
Chr3	6814001	6816000	4414	Chr3	6810001	6812000	3001	148	79.8036	2e-06
Chr3	6918001	6920000	2743	Chr3	6908001	6910000	3827	84	35.6513	2e-06
Chr3	7022001	7024000	3228	Chr3	7018001	7020000	6043	178	101.675	2e-06
Chr3	7046001	7048000	3020	Chr3	7044001	7046000	4137	180	103.823	2e-06
Chr3	7100001	7102000	2930	Chr3	7098001	7100000	4155	188	109.898	2e-06
Chr3	7346001	7348000	4246	Chr3	7338001	7340000	2718	95	42.6767	2e-06
Chr3	7836001	7838000	2885	Chr3	7834001	7836000	2102	125	63.4863	2e-06
Chr3	7902001	7904000	3488	Chr3	7894001	7896000	4681	125	62.8655	2e-06
Chr3	8738001	8740000	1437	Chr3	8734001	8736000	4793	104	49.3669	2e-06
Chr3	10870001	10872000	3583	Chr3	10868001	10870000	1874	155	85.2066	2e-06
Chr3	10890001	10892000	2819	Chr3	10884001	10886000	1616	72	28.2197	2e-06
Chr3	11030001	11032000	2134	Chr3	11018001	11020000	5683	93	41.4956	2e-06
Chr3	11070001	11072000	3398	Chr3	11064001	11066000	3204	114	55.318	2e-06
Chr3	15556001	15558000	5251	Chr3	15524001	15526000	4193	55	18.0759	2e-06
Chr3	15590001	15592000	2882	Chr3	15570001	15572000	5943	60	21.0109	2e-06
Chr3	15588001	15590000	2626	Chr3	15578001	15580000	7594	96	43.2211	2e-06
Chr3	15730001	15732000	1541	Chr3	15708001	15710000	5402	45	12.9483	2e-06
Chr3	15860001	15862000	3062	Chr3	15828001	15830000	5759	56	18.7977	2e-06
Chr3	15848001	15850000	5553	Chr3	15834001	15836000	1687	65	23.9722	2e-06
Chr3	15950001	15952000	2062	Chr3	15948001	15950000	5113	174	99.7845	2e-06
Chr3	16000001	16002000	3489	Chr3	15994001	15996000	3243	118	58.1115	2e-06
Chr3	16246001	16248000	7132	Chr3	16136001	16138000	1029	19	2.20191	2e-06
Chr3	16252001	16254000	1965	Chr3	16248001	16250000	5778	148	79.9507	2e-06
Chr3	16338001	16340000	5099	Chr3	16318001	16320000	1941	59	20.4209	2e-06
Chr3	16372001	16374000	3336	Chr3	16370001	16372000	3809	207	123.831	2e-06
Chr3	16830001	16832000	1924	Chr3	16828001	16830000	3308	125	63.4436	2e-06
Chr3	16888001	16890000	4138	Chr3	16886001	16888000	3556	227	139.9	2e-06
Chr3	17042001	17044000	4754	Chr3	17038001	17040000	1709	122	61.4184	2e-06
Chr3	17216001	17218000	4763	Chr3	17212001	17214000	2686	152	82.894	2e-06
Chr3	17654001	17656000	2341	Chr3	17652001	17654000	3982	152	82.6824	2e-06
Chr3	17666001	17668000	2952	Chr3	17660001	17662000	3680	107	50.7026	2e-06
Chr3	17876001	17878000	4754	Chr3	17872001	17874000	3259	173	97.9787	2e-06
Chr3	17926001	17928000	3845	Chr3	17924001	17926000	4620	250	157.795	2e-06
Chr3	17986001	17988000	2051	Chr3	17976001	17978000	3160	64	23.3109	2e-06
Chr3	19216001	19218000	1809	Chr3	19214001	19216000	3611	126	64.1752	2e-06
Chr3	19736001	19738000	4742	Chr3	19734001	19736000	2395	190	111.697	2e-06
Chr3	20784001	20786000	3880	Chr3	20782001	20784000	2508	179	103.062	2e-06
Chr3	20972001	20974000	3226	Chr3	20968001	20970000	3328	136	71.1322	2e-06
Chr3	21320001	21322000	4815	Chr3	21318001	21320000	3130	237	147.982	2e-06
Chr3	21984001	21986000	2197	Chr3	21982001	21984000	3642	158	87.254	2e-06
Chr3	22004001	22006000	4216	Chr3	21998001	22000000	4751	199	117.664	2e-06
Chr3	22074001	22076000	3247	Chr3	22070001	22072000	4603	186	108.189	2e-06
Chr3	23448001	23450000	4440	Chr3	23446001	23448000	3212	301	199.49	2e-06
Chr4	734001	736000	1799	Chr4	708001	710000	3853	58	19.9899	2e-06
Chr4	6918001	6920000	6332	Chr4	6912001	6914000	846	86	37.589	2e-06
Chr4	8228001	8230000	2888	Chr4	8224001	8226000	3483	166	92.868	2e-06
Chr4	11206001	11208000	6701	Chr4	11112001	11114000	2635	33	7.22628	2e-06
Chr4	14398001	14400000	3291	Chr4	14388001	14390000	4713	139	72.8091	2e-06
Chr4	15304001	15306000	4564	Chr4	15296001	15298000	3782	170	95.7916	2e-06
Chr5	418001	420000	1904	Chr5	414001	416000	4218	136	71.6188	2e-06
Chr5	2940001	2942000	3652	Chr5	2930001	2932000	2454	83	35.0432	2e-06
Chr5	3134001	3136000	3299	Chr5	3132001	3134000	2811	185	107.634	2e-06
Chr5	3908001	3910000	4850	Chr5	3904001	3906000	2917	175	99.8396	2e-06
Chr5	4810001	4812000	4178	Chr5	4808001	4810000	4014	261	166.082	2e-06
Chr5	5346001	5348000	4843	Chr5	5344001	5346000	4378	297	194.921	2e-06
Chr5	5564001	5566000	5099	Chr5	5560001	5562000	3766	199	118.097	2e-06
Chr5	6238001	6240000	4241	Chr5	6234001	6236000	2827	153	83.7241	2e-06
Chr5	7772001	7774000	4620	Chr5	7760001	7762000	3303	103	48.0589	2e-06
Chr5	10000001	10002000	3749	Chr5	9996001	9998000	6367	259	165.196	2e-06
Chr5	13824001	13826000	1742	Chr5	13780001	13782000	4682	34	7.72867	2e-06
Chr5	14860001	14862000	2397	Chr5	14852001	14854000	7121	169	95.7684	2e-06
Chr5	14952001	14954000	4381	Chr5	14948001	14950000	2573	179	102.74	2e-06
Chr5	16280001	16282000	3489	Chr5	16278001	16280000	2971	205	123.098	2e-06
Chr5	16348001	16350000	3231	Chr5	16344001	16346000	4115	174	98.6433	2e-06
Chr5	19972001	19974000	6820	Chr5	19968001	19970000	2148	192	113.476	2e-06
Chr5	21680001	21682000	3099	Chr5	21656001	21658000	2750	51	16.1452	2e-06
Chr5	21918001	21920000	3866	Chr5	21914001	21916000	3859	188	109.052	2e-06
Chr5	22072001	22074000	2768	Chr5	22062001	22064000	4439	108	51.6921	2e-06
Chr5	23182001	23184000	4400	Chr5	23176001	23178000	2308	134	69.7529	2e-06
Chr5	23458001	23460000	4127	Chr5	23456001	23458000	2552	187	108.911	2e-06
Chr5	23494001	23496000	6323	Chr5	23490001	23492000	4257	257	163.362	2e-06
Chr5	24870001	24872000	1284	Chr5	24866001	24868000	6008	119	59.8527	2e-06
Chr5	25182001	25184000	3194	Chr5	25180001	25182000	2033	160	89.0779	2e-06
Chr1	20001	22000	1858	Chr1	12001	14000	2578	119	59.8699	3e-06
Chr1	10700001	10702000	3431	Chr1	10696001	10698000	3831	218	133.336	3e-06
Chr1	20474001	20476000	2875	Chr1	12568001	12570000	3559	14	0.080272	3e-06
Chr1	26376001	26378000	1419	Chr1	26360001	26362000	3332	57	19.7585	3e-06
Chr2	6588001	6590000	3878	Chr2	6434001	6436000	5549	29	5.74142	3e-06
Chr2	10470001	10472000	1022	Chr2	9842001	9844000	2123	14	0.1904	3e-06
Chr2	14738001	14740000	5739	Chr2	14736001	14738000	2862	285	187.68	3e-06
Chr2	19554001	19556000	3800	Chr2	19552001	19554000	4686	369	256.521	3e-06
Chr3	372001	374000	3640	Chr3	370001	372000	2969	181	105.032	3e-06
Chr3	700001	702000	3897	Chr3	698001	700000	3236	214	130.159	3e-06
Chr3	760001	762000	1945	Chr3	756001	758000	3568	106	50.7335	3e-06
Chr3	3114001	3116000	6437	Chr3	1936001	1938000	4402	14	0.925199	3e-06
Chr3	3102001	3104000	4609	Chr3	1938001	1940000	3953	14	0.610909	3e-06
Chr3	3112001	3114000	8735	Chr3	1940001	1942000	2213	14	0.629287	3e-06
Chr3	3112001	3114000	8735	Chr3	1942001	1944000	2306	14	0.658826	3e-06
Chr3	3096001	3098000	4723	Chr3	1946001	1948000	4228	14	0.672284	3e-06
Chr3	3102001	3104000	4609	Chr3	1948001	1950000	4614	14	0.712022	3e-06
Chr3	3112001	3114000	8735	Chr3	1950001	1952000	1874	14	0.540688	3e-06
Chr3	3096001	3098000	4723	Chr3	1958001	1960000	5606	14	0.861515	3e-06
Chr3	3102001	3104000	4609	Chr3	1970001	1972000	2901	14	0.46422	3e-06
Chr3	22514001	22516000	9865	Chr3	1970001	1972000	2901	14	0.069017	3e-06
Chr3	22516001	22518000	7437	Chr3	1970001	1972000	2901	14	0.052199	3e-06
Chr3	22580001	22582000	3518	Chr3	1970001	1972000	2901	14	0.031092	3e-06
Chr3	3100001	3102000	3800	Chr3	1972001	1974000	2586	14	0.338362	3e-06
Chr3	3102001	3104000	4609	Chr3	1972001	1974000	2586	14	0.408506	3e-06
Chr3	3108001	3110000	3213	Chr3	1972001	1974000	2586	14	0.284455	3e-06
Chr3	3118001	3120000	1559	Chr3	1974001	1976000	3127	14	0.174637	3e-06
Chr3	3138001	3140000	4572	Chr3	1982001	1984000	4739	14	0.758804	3e-06
Chr3	3106001	3108000	4321	Chr3	1984001	1986000	4934	14	0.69886	3e-06
Chr3	3098001	3100000	3081	Chr3	1986001	1988000	5283	14	0.54725	3e-06
Chr3	2594001	2596000	3366	Chr3	2590001	2592000	2943	121	60.6967	3e-06
Chr3	2954001	2956000	4904	Chr3	2952001	2954000	2630	172	98.2449	3e-06
Chr3	3566001	3568000	5085	Chr3	3558001	3560000	5171	162	90.3435	3e-06
Chr3	4352001	4354000	6619	Chr3	4342001	4344000	1763	84	36.0466	3e-06
Chr3	4450001	4452000	4473	Chr3	4448001	4450000	1420	124	63.5291	3e-06
Chr3	4718001	4720000	2641	Chr3	4716001	4718000	3440	156	86.4443	3e-06
Chr3	5650001	5652000	2459	Chr3	5648001	5650000	3600	157	87.2844	3e-06
Chr3	6542001	6544000	3383	Chr3	6520001	6522000	2896	51	16.3012	3e-06
Chr3	6572001	6574000	2819	Chr3	6568001	6570000	3680	131	67.8679	3e-06
Chr3	6594001	6596000	3458	Chr3	6582001	6584000	2814	71	27.7794	3e-06
[truncated: 3,776 more rows]

## Sheet: association_with_CS1-CS6
Association analysis of the identified 5773 significant interacting loci by six chromatin states
	CS1	CS2	CS3	CS4	CS5	CS6
CS1	228	477	15	328	603	55
CS2	/	912	55	788	447	238
CS3	/	/	45	80	9	138
CS4	/	/	/	106	190	292
CS5	/	/	/	/	364	39
CS6	/	/	/	/	/	364
